# Supplementary material
Source: Elsevier journal article supplement (https://hal.sorbonne-universite.fr/hal-03145091v1/file/mmc5.pdf)
Supplement: mmc5 [file mmc5.pdf]

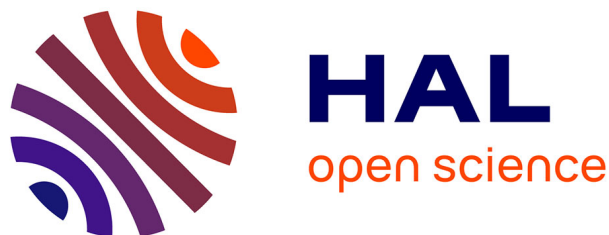

## Loss of floor plate Netrin-1 impairs midline crossing of corticospinal axons and leads to mirror movements

Nadège Sarrazin, Fabio Marti, Nicolas Heck, Cecile Gallea, Mohamed Doulazmi, Sergi Roig Puiggros, Juan Antonio Moreno-Bravo, Marie Vidailhet, Alain Trembleau, Philippe Faure, et al.

### ► To cite this version:

Nadège Sarrazin, Fabio Marti, Nicolas Heck, Cecile Gallea, Mohamed Doulazmi, et al.. Loss of floor plate Netrin-1 impairs midline crossing of corticospinal axons and leads to mirror movements. *Cell Reports*, 2021, 34 (3), pp.108654. 10.1016/j.celrep.2020.108654 . hal-03145091

**HAL Id: hal-03145091**

**<https://hal.sorbonne-universite.fr/hal-03145091>**

Submitted on 18 Feb 2021

**HAL** is a multi-disciplinary open access archive for the deposit and dissemination of scientific research documents, whether they are published or not. The documents may come from teaching and research institutions in France or abroad, or from public or private research centers.

L'archive ouverte pluridisciplinaire **HAL**, est destinée au dépôt et à la diffusion de documents scientifiques de niveau recherche, publiés ou non, émanant des établissements d'enseignement et de recherche français ou étrangers, des laboratoires publics ou privés.

# Loss of floor plate Netrin-1 impairs midline crossing of corticospinal axons and leads to mirror movements

## Graphical Abstract

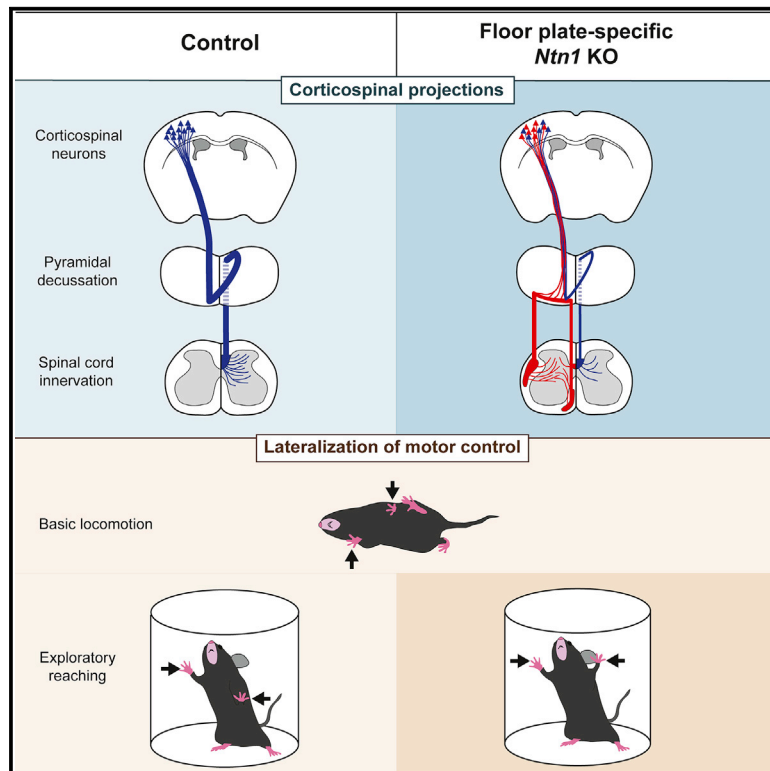

## Authors

Oriane Pourchet, Marie-Pierre Morel, Quentin Welniarz, ..., Alain Chédotal, Emmanuel Roze, Isabelle Dusart

## Correspondence

isabelle.dusart@upmc.fr

## In Brief

Pourchet et al. show that depletion of floor plate Netrin-1 disrupts the guidance of corticospinal axons at the pyramidal decussation and leads to abnormal ipsilateral projections. This anatomical defect impairs lateralization of voluntary, but not automatic, movements, similar to what is observed in patients with congenital mirror movements.

## Highlights

- Depletion of floor plate Netrin-1 impairs midline crossing of corticospinal axons
- *Shh::cre;Ntn1<sup>lox/lox</sup>* mice have functional ipsilateral corticospinal projections
- Lateralization of voluntary motor controls is selectively altered in these mice
- These mice represent a model for human congenital mirror movements

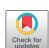

## Report

# Loss of floor plate Netrin-1 impairs midline crossing of corticospinal axons and leads to mirror movements

Oriane Pourchet,<sup>1,2</sup> Marie-Pierre Morel,<sup>2</sup> Quentin Welniarz,<sup>1</sup> Nadège Sarrazin,<sup>1</sup> Fabio Marti,<sup>2</sup> Nicolas Heck,<sup>2</sup> Cécile Galléa,<sup>1</sup> Mohamed Doulazmi,<sup>3</sup> Sergi Roig Puiggros,<sup>4</sup> Juan Antonio Moreno-Bravo,<sup>4</sup> Marie Vidailhet,<sup>1,5</sup> Alain Trembleau,<sup>2</sup> Philippe Faure,<sup>2</sup> Alain Chédotal,<sup>4</sup> Emmanuel Roze,<sup>1,5,6</sup> and Isabelle Dusart<sup>2,6,7,\*</sup>

<sup>1</sup>Sorbonne Université, CNRS, INSERM, Institut du Cerveau et de la Moelle Épineuse (ICM), 75013 Paris, France

<sup>2</sup>Sorbonne Université, CNRS, INSERM, Institut de Biologie Paris-Seine (IBPS), Neuroscience Paris-Seine (NPS), 75005 Paris, France

<sup>3</sup>Sorbonne Université, CNRS, INSERM, Institut de Biologie Paris-Seine (IBPS), Adaptation Biologique et Vieillesse, 75005 Paris, France

<sup>4</sup>Sorbonne Université, CNRS, INSERM, Institut de la Vision, 75012 Paris, France

<sup>5</sup>Département de Neurologie, Assistance Publique-Hôpitaux de Paris, Hôpital de la Pitié-Salpêtrière, 75013 Paris, France

<sup>6</sup>These authors contributed equally

<sup>7</sup>Lead contact

\*Correspondence: [isabelle.dusart@upmc.fr](mailto:isabelle.dusart@upmc.fr)

<https://doi.org/10.1016/j.celrep.2020.108654>

## SUMMARY

In humans, execution of unimanual movements requires lateralized activation of the primary motor cortex, which then transmits the motor command to the contralateral hand through the crossed corticospinal tract (CST). Mutations in *NTN1* alter motor control lateralization, leading to congenital mirror movements. To address the role of midline Netrin-1 on CST development and subsequent motor control, we analyze the morphological and functional consequences of floor plate Netrin-1 depletion in conditional knockout mice. We show that depletion of floor plate Netrin-1 in the brainstem critically disrupts CST midline crossing, whereas the other commissural systems are preserved. The only associated defect is an abnormal entry of CST axons within the inferior olive. Alteration of CST midline crossing results in functional ipsilateral projections and is associated with abnormal symmetric movements. Our study reveals the role of Netrin-1 in CST development and describes a mouse model recapitulating the characteristics of human congenital mirror movements.

## INTRODUCTION

Asymmetric voluntary movements, such as opening a bottle or texting a friend, are essential to everyday life. In humans, execution of unimanual movements requires communication between secondary motor areas and primary motor areas, to activate one motor cortex, which then transmits the motor command to the contralateral hand through the crossed corticospinal tract (CST). Congenital mirror movement syndrome (CMM) is a rare neurological disorder characterized by the inability to perform unilateral movements with the hands (Méneret et al., 2015). Patients with CMM experience difficulties in bimanual activities of daily living requiring asymmetric voluntary movements and fine motor coordination. Among the different defects observed in patients with CMM, the most consistent one is the presence of an abnormal corticospinal tract (CST) decussation resulting in corticospinal axons projecting to both sides of the spinal cord (Welniarz et al., 2015). Several mutant mice display abnormal CST decussation (Cohen et al., 1998; Faulkner et al., 2008; Finger et al., 2002; Rünker et al., 2008). However, they do not allow the study of the contribution of abnormal CST decussation to

the lateralization of motor control, because of the presence of additional guidance defects in other parts of the central nervous system (CNS). How CST development relates to the lateralization of motor control thus remains unclear.

The *NTN1* gene has been associated to CMM (Méneret et al., 2017). It encodes the extracellular protein Netrin-1, which influences the formation and maintenance of multiple tissues (Sun et al., 2011). In the developing nervous system, Netrin-1 acts as a guidance cue required for midline crossing of many commissural axons (Serafini et al., 1996). Mutations in the Netrin-1 receptor genes *Dcc* and *Unc5c* impair midline crossing of the CST (Finger et al., 2002; Welniarz et al., 2017a), suggesting that Netrin-1 could be required for proper CST decussation. Yet, direct evidence of the contribution of Netrin-1 is still critically lacking because *Ntn1*<sup>KO</sup> mice die at birth (Serafini et al., 1996), when corticospinal axons reach the pyramidal decussation (Canty and Murphy, 2008). *Shh::cre;Ntn1*<sup>lox/lox</sup> is a viable mouse model, in which *Ntn1* depletion is restricted to the floor plate in the regions of the CNS located caudal to the midbrain/hindbrain boundary. Interestingly, midline crossing of spinal cord and hindbrain commissural axons is mostly preserved in this model

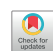

(Dominici et al., 2017; Moreno-Bravo et al., 2019; Varadarajan et al., 2017; Wu et al., 2019). Yet, development of the corticospinal axons, which occurs over a protracted period, has not been investigated in these mice. In the present study, we analyzed the anatomy of the corticospinal tract and the presence of symmetric movements in *Shh::cre;Ntn1<sup>lox/lox</sup>* mice to determine the contribution of floor plate Netrin-1 in midline crossing of corticospinal axons and lateralization of motor control.

## RESULTS

### Depletion of floor plate-Netrin-1 in the brainstem impairs CST midline crossing at the pyramidal decussation

We first used protein kinase C gamma (PKC $\gamma$ ) immunohistochemistry to characterize the anatomy of the CST in adult *Shh::cre;Ntn1<sup>lox/lox</sup>* mice (Figure 1A). The tract was comparable with control mice (Figure 1A; Figure S1A) down to the medulla level, where corticospinal axons formed two compact ventromedial tracts. In control mice, the CST remained fasciculated until the junction between the brainstem and the spinal cord. There, it turned dorsally and crossed the midline to enter into the dorsal funiculi of the spinal cord, forming the so-called pyramidal decussation. In *Shh::cre;Ntn1<sup>lox/lox</sup>* mice, the CST splits into several bundles of axons just before the junction between brainstem and spinal cord. At this level, the CST spread laterally and the pyramidal decussation was thinner than in the control. Accordingly, fewer corticospinal axons were detected in the dorsal funiculi of the spinal cord of *Shh::cre;Ntn1<sup>lox/lox</sup>* mice, and the remaining corticospinal axons were observed in the ventromedial and lateral funiculi of the spinal cord. To assess the laterality of these abnormal corticospinal projections, we injected either tdTomato-expressing adenovirus or biotinylated dextran amine unilaterally in the motor cortex of *Shh::cre;Ntn1<sup>lox/lox</sup>* and control mice. All labeled corticospinal axons reached the contralateral side of spinal cord in control mice. In *Shh::cre;Ntn1<sup>lox/lox</sup>* mice, corticospinal axons were detected on both sides of the spinal cord with a variable proportion of axons on each side (Figures 1B and 1C; Video S1; Figure S1B). Floor plate-Netrin-1 is thus required for midline crossing of corticospinal axons at the pyramidal decussation.

To further specify which source of floor plate-Netrin-1 controls CST midline crossing at the pyramidal decussation, we analyzed CST anatomy in *Hoxa-1* Enhancer III (*EIII*)-*cre;Ntn1<sup>lox/lox</sup>* mice, in which ablation of floor plate-Netrin-1 is restricted to the spinal cord (Figure S2A). Contrary to *Shh::cre;Ntn1<sup>lox/lox</sup>* mice, no alteration of CST trajectory could be detected in these mutants. In particular, all the CST axons crossed the midline at the pyramidal decussation and projected normally into the contralateral spinal cord (Figure S2B). Therefore, CST midline crossing does not rely on the production of floor plate-Netrin-1 by the spinal cord, but rather by the regions located rostral to the pyramidal decussation.

### Disruption of the pyramidal decussation in *Shh::cre;Ntn1<sup>lox/lox</sup>* mice is associated with an abnormal position of CST axons within the inferior olive

We previously demonstrated that the Netrin-1 receptor DCC controls CST midline crossing non-cell-autonomously (Welnarz

et al., 2017a), arguing against a direct effect of Netrin-1 on CST axons. Depletion of floor plate-Netrin-1 rostral to the pyramidal decussation could indirectly disrupt CST midline crossing, by inducing morphological or molecular alterations along the CST trajectory. In *Shh::cre;Ntn1<sup>lox/lox</sup>* mice, the first CST trajectory defects were observed within the caudal medulla. We identified two candidate structures, which depend on Netrin-1 for their development within the caudal medulla and are located on the CST trajectory: the lemniscal decussation (Kubota et al., 2004) and the inferior olive (Bloch-Gallego et al., 1999). The lemniscal decussation, formed by the axons of the dorsal column nuclei (DCN) that project to the contralateral thalamus, could act as a “guiding scaffold” for CST axons (Cohen et al., 1998). To analyze the lemniscal decussation, we performed unilateral injection of a retrograde tracer in the thalamus of *Shh::cre;Ntn1<sup>lox/lox</sup>* and *Ntn1<sup>lox/lox</sup>* mice. Similar retrograde labeling was seen in the contralateral DCN of both *Shh::cre;Ntn1<sup>lox/lox</sup>* and *Ntn1<sup>lox/lox</sup>* mice (Figures S3A and S3B), indicating that the lemniscal decussation was preserved in *Shh::cre;Ntn1<sup>lox/lox</sup>* mice.

We then focused on the inferior olive, which surrounds the CST just rostral to the pyramidal decussation. Remarkably, in *Shh::cre;Ntn1<sup>lox/lox</sup>* mutants, the morphology of the inferior olive was altered in its rostral part, with a ventral displacement of the medial subnucleus (Figure 1D). This defect was consistently associated with a mispositioning of CST bundles within the inferior olive. The inferior olive was well formed, and no structural abnormality could be detected before the arrival of CST axons in embryonic day (E) 18 mutants (Video S2). This suggests that the structural alteration of the inferior olive seen in adult *Shh::cre;Ntn1<sup>lox/lox</sup>* mice could be the consequence of the abnormal entry of CST axons within the inferior olive.

### Abnormalities of descending brain-spinal cord projections are restricted to the CST in *Shh::cre;Ntn1<sup>lox/lox</sup>* mice

Previous characterization of *Shh::cre;Ntn1<sup>lox/lox</sup>* mice revealed that guidance of commissural axons of the spinal cord was mostly preserved (Dominici et al., 2017; Moreno-Bravo et al., 2019; Varadarajan et al., 2017; Wu et al., 2019). In addition, we found no alteration of *Ntn1* expression in the forebrain, suggesting that the intra-cortical circuitry is preserved in the mutants (Figure S4A). We showed that *Ntn1* is expressed at least until post-natal day (P) 0 in the floor plate of the brainstem in *Ntn1<sup>lox/lox</sup>* mice, but not in *Shh::cre;Ntn1<sup>lox/lox</sup>* mice (Figure S4B). We then wondered whether the CST projection defect was accompanied by a disruption of other descending brain-spinal cord projections in *Shh::cre;Ntn1<sup>lox/lox</sup>* mice. To answer this question, we performed unilateral injection of a retrograde tracer in the cervical spinal cord (Figures 2A and 2B) and analyzed the laterality of retrograde labeling in several projecting structures, among which were the red nucleus and the pontine and medullary reticular formations, which are known to participate to motor control (Basista and Yoshida, 2020; Lemon, 2008). Although this experiment confirmed the lateralization defect of the CST, we did not detect any alteration in the lateralization of the descending projections from the red nucleus, pontine and medullary reticular formation, parhypothalamic nucleus, paralemniscal nucleus, vestibular nuclei, and Barrington’s nucleus (Figure 2; Figure S5).



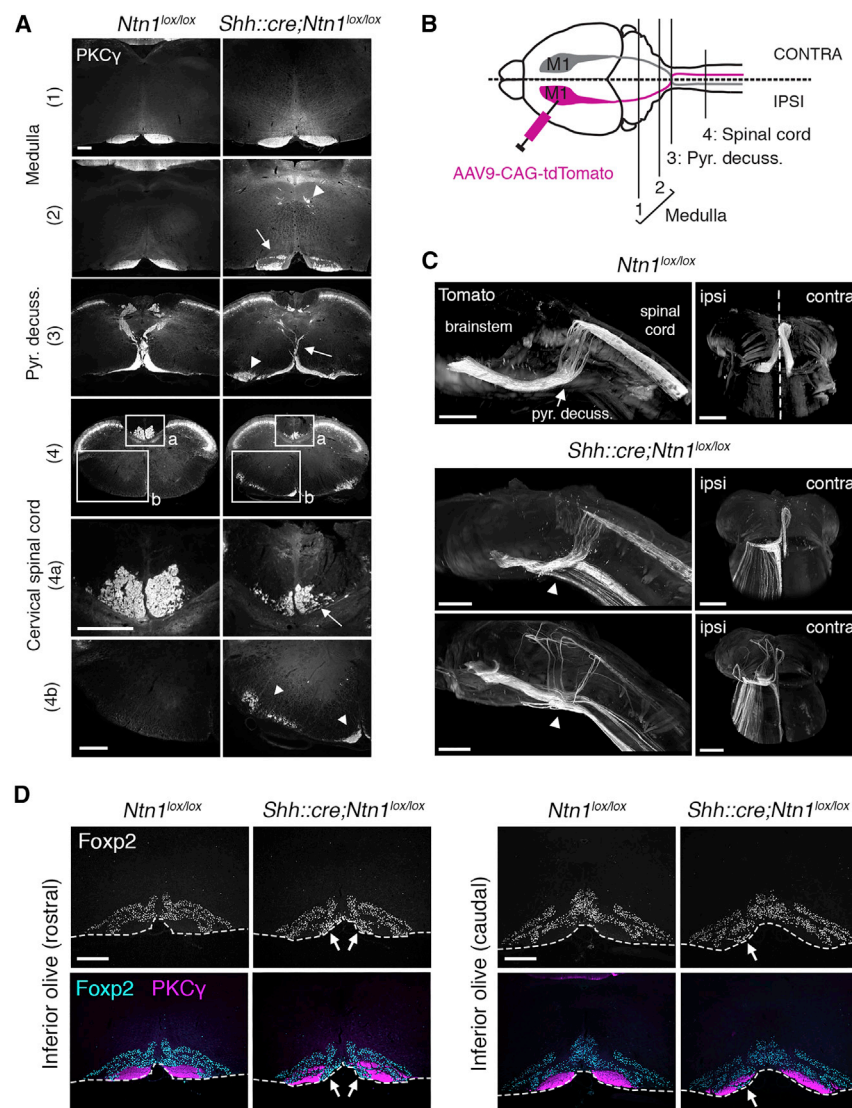

**Figure 1. Adult *Shh::cre;Ntn1<sup>lox/lox</sup>* mice have an alteration of CST trajectory at the pyramidal decussation associated to an anatomical defect of the inferior olive (IO)**

(A) Coronal sections of adult *Ntn1<sup>lox/lox</sup>* ( $n = 4$ ) and *Shh::cre;Ntn1<sup>lox/lox</sup>* mice ( $n = 5$ ) stained with anti-PKCγ, a corticospinal tract (CST) marker. (1) Upper and (2) lower medulla, (3) pyramidal decussation (pyr. decuss.), and (4) cervical spinal cord. (2) Some CST bundles are separated from the main tract (arrow), and some aberrant dorsal trajectories can be observed (arrowhead); (3) pyramidal decussation is thinner (arrow), and CST spreads laterally (arrowhead); (4) fewer axons are seen in the dorsal funiculi (4a, arrow), and ectopic axons are in ventromedial and lateral funiculi (4b, arrowheads). Scale bars, 250 μm.

(B) Schematic showing CST tracing strategy and CNS levels for coronal sections shown in (A).

(C) Three-quarter and caudal 3D views of cleared brainstems of *Ntn1<sup>lox/lox</sup>* adult ( $n = 2$ ) and *Shh::cre;Ntn1<sup>lox/lox</sup>* mice ( $n = 3$ ) after unilateral tdTomato injection. In *Shh::cre;Ntn1<sup>lox/lox</sup>* mice, many CST axons remain ventral (arrowheads) and do not cross the midline (dotted line). Some axons turn dorsally without crossing the midline (bottom panel). Ipsi and contra are, respectively, ipsilateral and contralateral sides with respect to injection side. Scale bars, 800 μm.

(D) Coronal sections of IO of adult *Ntn1<sup>lox/lox</sup>* ( $n = 4$ ) and *Shh::cre;Ntn1<sup>lox/lox</sup>* mice ( $n = 5$ ), stained with anti-Foxp2, a marker for IO neurons. In *Shh::cre;Ntn1<sup>lox/lox</sup>* mice, the medial nucleus of the IO lies abnormally against the CNS ventral border (dotted line) (arrows); abnormal intermingling of CST bundles and IO neurons is seen rostrally; and overall IO anatomy is less altered caudally, but the CST is more flattened and laterally spread compared with control mice. Scale bars, 400 μm.

*Shh::cre;Ntn1<sup>lox/lox</sup>* mice are therefore an accurate model to analyze the contribution of a CST decussation defect to the lateralization of motor control.

### The CST abnormally innervates the ipsilateral spinal cord in *Shh::cre;Ntn1<sup>lox/lox</sup>* mice

We first characterized the consequences of the CST defect of *Shh::cre;Ntn1<sup>lox/lox</sup>* mice on spinal cord innervation (Figure 3A). In the mouse spinal cord, corticospinal axons leave the white matter to enter the gray matter, mostly at the cervical and lumbar enlargements (Canty and Murphy, 2008). There, they terminate mainly in the dorsal and intermediate horns of the contralateral spinal cord, where they contact interneurons, which eventually transmit the command to forelimb and hindlimb motoneurons (Asante and Martin, 2013; Welniarz et al., 2017b). At both cervical and lumbar enlargements, massive abnormal ipsilateral innervation was found in the gray matter of *Shh::cre;Ntn1<sup>lox/lox</sup>* mice (Fig-

ure 3A). To analyze the distribution of corticospinal synapses in the gray matter, we studied the colocalization of VGLUT1 puncta with tomato-positive boutons (Figure 3B). The dorso-ventral distribution of corticospinal synapses was comparable between *Shh::cre;Ntn1<sup>lox/lox</sup>* and control mice, with a higher proportion of synapses detected in the dorsal region compared with the intermediate region. Yet, lateralization of the synapses was altered in *Shh::cre;Ntn1<sup>lox/lox</sup>* mice. In these mutants, synapses were detected on both sides of the gray matter, with a proportion of synapses in the ipsilateral side ranging from 24% to 70%, whereas they were almost exclusively found in the contralateral gray matter in control mice.

We then sought to determine whether the abnormal ipsilateral CST innervation of *Shh::cre;Ntn1<sup>lox/lox</sup>* mice was functional. We applied unilateral cortical electric stimulations and recorded the evoked electromyographic (EMG) responses in contralateral and ipsilateral gastrocnemii muscles (Figure 3C). In control mice,

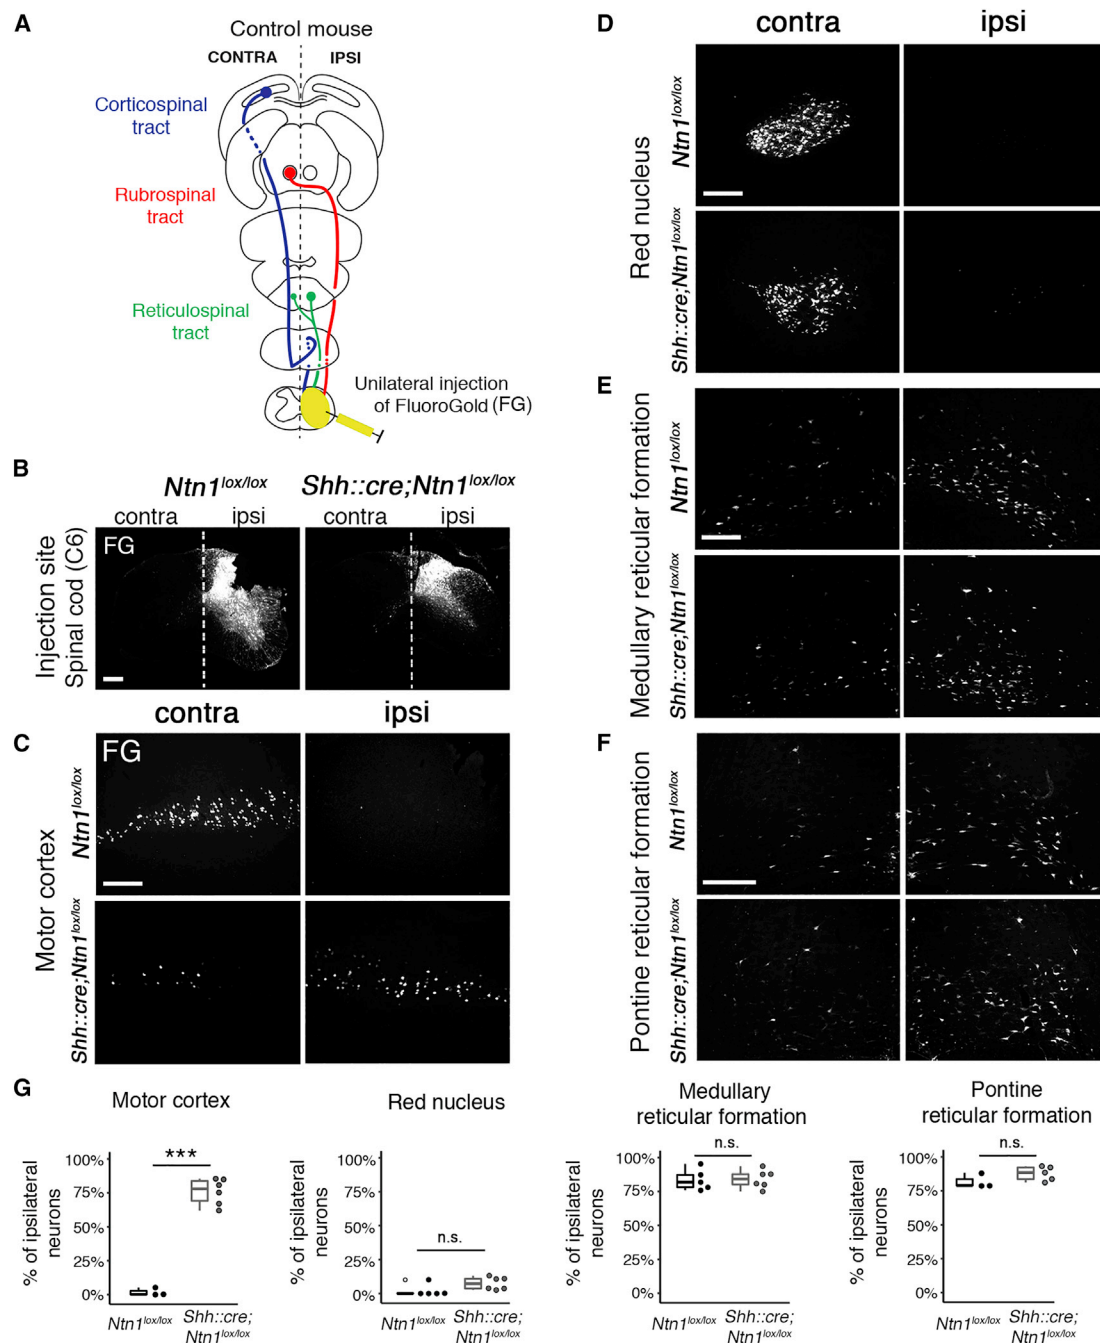

**Figure 2. Lateralization of rubrospinal and reticulospinal tracts is preserved in *Shh::cre;Ntn1*<sup>lox/lox</sup> mice**

(A) Schematic showing injection site of the retrograde tracer (yellow ellipse) and projection and origin of corticospinal (blue), rubrospinal (red), and reticulospinal tracts (green) in adult control mouse.

(B) Coronal sections after unilateral FluoroGold (FG) injection on the right side of lower cervical spinal cord in *Ntn1*<sup>lox/lox</sup> (n = 5) and *Shh::cre;Ntn1*<sup>lox/lox</sup> mice (n = 6). Scale bar, 250  $\mu$ m.

(C–F) Coronal sections of contralateral and ipsilateral motor cortices (C), red nuclei (D), medullary, and pontine reticular formations (E and F) of *Ntn1*<sup>lox/lox</sup> and *Shh::cre;Ntn1*<sup>lox/lox</sup> mice. Contra and ipsi are, respectively, contralateral and ipsilateral sides with respect to the injection side. Scale bars, 250  $\mu$ m.

(G) Proportion of ipsilateral FG-positive neurons in the motor cortex for n = 3 *Ntn1*<sup>lox/lox</sup> mice (black dots) and n = 6 *Shh::cre;Ntn1*<sup>lox/lox</sup> mice (gray dots), \*\*\*p < 0.001 (two-sided t test); in the red nucleus and the medullary reticular formation for n = 5 *Ntn1*<sup>lox/lox</sup> and n = 6 *Shh::cre;Ntn1*<sup>lox/lox</sup> mice, p = 0.1173 (Mann-Whitney) and p = 0.9148 (two-sided t test), respectively; and in the pontine reticular formation for n = 3 *Ntn1*<sup>lox/lox</sup> and n = 5 *Shh::cre;Ntn1*<sup>lox/lox</sup> mice, p = 0.142 (Mann-Whitney). Data are presented as scatterplot and boxplot, with first and third quartiles, and median.

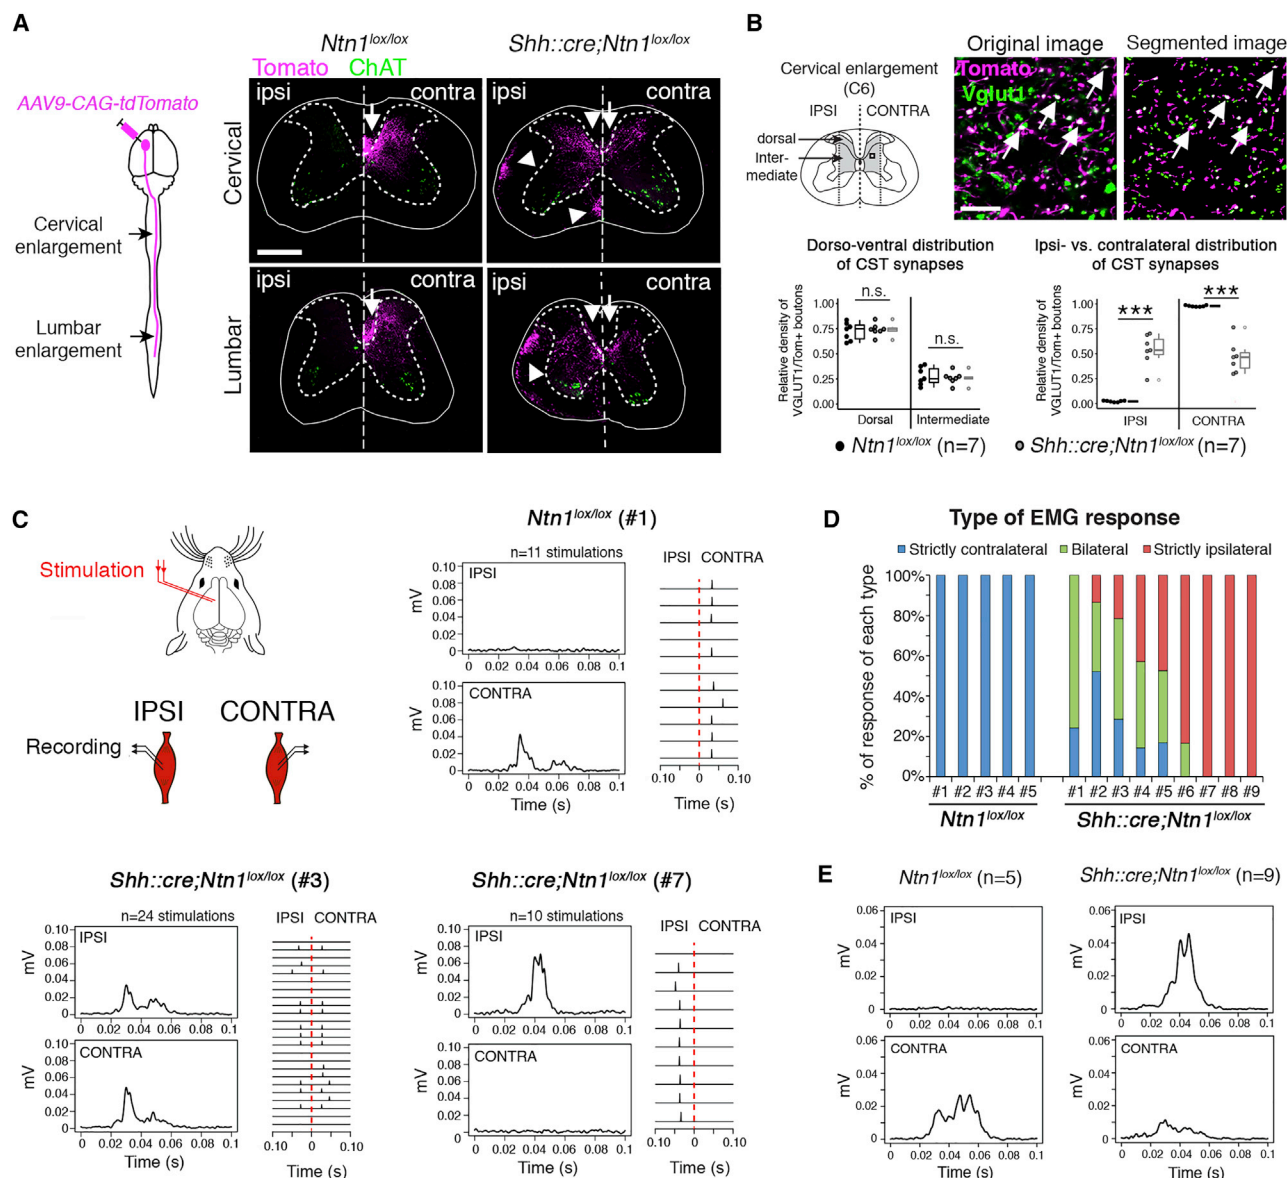

**Figure 3. *Shh::cre;Ntn1<sup>lox/lox</sup>* mice have abnormal but functional ipsilateral CST projections**

(A) Schematic representing unilateral CST labeling and coronal sections of adult *Ntn1<sup>lox/lox</sup>* (n = 7) and *Shh::cre;Ntn1<sup>lox/lox</sup>* mice (n = 7) stained with anti-DsRED (revealing Tomato) and anti-ChAT (choline acetyltransferase, motoneuron marker). CST axons are detected in contralateral dorsal funiculus (arrow) in *Ntn1<sup>lox/lox</sup>* mice, whereas they are mostly seen in ipsilateral ventral and lateral funiculi (arrowheads) in *Shh::cre;Ntn1<sup>lox/lox</sup>* mice and, to a lesser extent, in ipsilateral (arrow) and contralateral (arrowhead) dorsal funiculi. Scale bar, 500  $\mu$ m.

(B) Top: schematic of a cervical spinal cord coronal section showing in gray the region of interests (ROIs) where density of CST synapses was analyzed; original and segmented confocal images of a subregion of *Shh::cre;Ntn1<sup>lox/lox</sup>* gray matter; corticospinal synapses (white points, arrows) are identified by the colocalization of anti-DsRED and anti-VGLUT1 (vesicular glutamate transporter 1). Scale bar, 10  $\mu$ m. Bottom: relative density of CST synapses in dorsal and intermediate regions, p = 0.633 (two-sided t test). Relative density in ipsilateral and contralateral sides, \*\*\*p < 0.0001 (two-sided t test). Data are presented as scatterplot and boxplot, with first and third quartiles, and median.

(C) Schematic of electrophysiological procedure. Electric stimulations were delivered in one motor cortex, and evoked EMG were recorded in ipsilateral and contralateral gastrocnemii muscles of adult *Ntn1<sup>lox/lox</sup>* (n = 5) and *Shh::cre;Ntn1<sup>lox/lox</sup>* mice (n = 9). Examples of average EMG responses from three mice (#1 *Ntn1<sup>lox/lox</sup>*, #3 and #7 *Shh::cre;Ntn1<sup>lox/lox</sup>*) and corresponding raster plots showing different patterns of response.

(D) Unilateral cortical stimulations evoked ipsilateral, bilateral, and/or contralateral EMG responses in *Shh::cre;Ntn1<sup>lox/lox</sup>* mice.

(E) Average EMG responses for the five *Ntn1<sup>lox/lox</sup>* and the nine *Shh::cre;Ntn1<sup>lox/lox</sup>* mice.



cortical stimulation triggered contraction of the contralateral gastrocnemius with corresponding EMG responses (Figures 3C–3E). In *Shh::cre;Ntn1<sup>lox/lox</sup>* mice, similar cortical stimulations elicited either contralateral, bilateral, or ipsilateral EMG responses (Figures 3C–3E). This shows that aberrant ipsilateral corticospinal projections of *Shh::cre;Ntn1<sup>lox/lox</sup>* mice are functional. The ipsilateral-only EMG responses produced by cortical stimulations (Figure 3C, bottom right) further suggest that ipsilateral CST projections are not collateral branches of the contralateral corticospinal neurons but rather independent projections.

### Lateralization of voluntary movements is altered in *Shh::cre;Ntn1<sup>lox/lox</sup>* mice

We first submitted *Shh::cre;Ntn1<sup>lox/lox</sup>* mice to classic motor tests. Their general motor behavior was mostly undistinguishable from control littermates (Figure 4A), indicating that changes in ratio of contralateral versus ipsilateral corticospinal projections do not significantly influence basic overground locomotion, balance, or motor coordination. We then analyzed the ability of *Shh::cre;Ntn1<sup>lox/lox</sup>* mice to perform lateralized coordinated movements for two different types of movements, namely, automatic movements and voluntary movements. Lateralization during automatic movements was investigated with the treadmill locomotion task. In this task, left-right alternation of forelimbs and hindlimbs was preserved in *Shh::cre;Ntn1<sup>lox/lox</sup>* mice. The proportion of symmetric movements was very low and similar to control mice (Figure 4B; Video S3). We then used the adaptive locomotion and the exploratory reaching tasks to analyze lateralized motor control during voluntary movements. These two tests have been developed specifically to reveal the presence of abnormal symmetric voluntary movements in mice (Serradij et al., 2014). Interestingly, *Shh::cre;Ntn1<sup>lox/lox</sup>* mice produced a significantly higher proportion of symmetric movements compared with control mice, both in adaptive locomotion and reaching tasks (Figures 4C and 4D; Video S3). Therefore, lateralized control of voluntary movements is selectively impaired in *Shh::cre;Ntn1<sup>lox/lox</sup>* mice. To definitely exclude any contribution of the spinal circuitry in the production of these abnormal symmetric voluntary movements, we analyzed the behavior of *Ell1-cre;Ntn1<sup>lox/lox</sup>* mice, in which ablation of floor plate-*Ntn1* is restricted to the spinal cord. Contrary to *Shh::cre;Ntn1<sup>lox/lox</sup>* mice, we found that lateralization of voluntary movements was preserved in these mice (Figure S2C). Overall, these findings reveal that disruption of the pyramidal decussation in *Shh::cre;Ntn1<sup>lox/lox</sup>* mice specifically impairs the production of voluntary asymmetric movements.

## DISCUSSION

Using the viable *Shh::cre;Ntn1<sup>lox/lox</sup>* mouse model, we demonstrated that midline crossing of corticospinal axons is disrupted in the absence of floor plate-Netrin-1. This unveils an unexpected and specific guidance mechanism for corticospinal axons, because floor plate-Netrin-1 was proved to be dispensable or mostly dispensable for midline crossing of hindbrain commissural axons and spinal commissural axons, respectively. Guidance of these ventral commissural axons mainly relies on another source of Netrin-1, produced by the progenitor cells of

the ventricular zone (Dominici et al., 2017; Moreno-Bravo et al., 2019; Varadarajan et al., 2017; Wu et al., 2019). This later source of Netrin-1 might also contribute to proper CST decussation, because floor plate-specific depletion of Netrin-1 does not completely abrogate CST midline crossing.

We found that CST midline crossing does not rely on the production of floor plate-Netrin-1 by the spinal cord, but rather by the regions located rostral to the pyramidal decussation. The only associated defect seen in *Shh::cre;Ntn1<sup>lox/lox</sup>* mice is a mispositioning of the CST relative to the inferior olivary nuclei, suggesting that proper inferior olive-CST interaction could play a critical role in CST midline crossing, as proposed before (Rünker et al., 2008). Displacement of CST axons at this level could prevent them from responding correctly to other cues located at the midline. Reduction or absence of pyramidal decussation was also reported in *Unc5c<sup>rcm</sup>* mutants (Finger et al., 2002) and in *Dcc<sup>Kanga</sup>* mice (Finger et al., 2002; Welniarz et al., 2017a) carrying a spontaneous viable mutation in *Dcc* (Finger et al., 2002). Interestingly, in both *Unc5c<sup>rcm</sup>* and *Dcc<sup>Kanga</sup>* mice, CST axons are also mispositioned at the level of the inferior olive, suggesting that *Dcc*, *Unc5c*, and *Netrin-1* could act in a single pathway to indirectly influence CST midline crossing by controlling the inferior olive-CST interaction and/or their relative position. Yet, some phenotypic differences between *Dcc* or *Unc5c* mutants and *Shh::cre;Ntn1<sup>lox/lox</sup>* mice should be highlighted. Although the anatomy of inferior olive is altered in *Unc5c* and *Dcc* knockout (KO) before the arrival of CST axons (Kim and Ackerman, 2011; Marcos et al., 2009), we could not detect any structural alteration in the inferior olive of E18 *Shh::cre;Ntn1<sup>lox/lox</sup>* mice. Also, intermingling of CST axons and inferior olivary neurons seen in *Shh::cre;Ntn1<sup>lox/lox</sup>* mice has not been reported in *Unc5c<sup>rcm</sup>* or *Dcc<sup>Kanga</sup>* mice. These data suggest that depletion of floor plate-Netrin-1 could influence the position of CST axons by preventing their normal segregation from the inferior olive. The mechanism underlying this hypothesis is not understood. At this stage, we cannot exclude the possibility of a direct action of floor plate-Netrin-1 on CST axons through receptors other than DCC or UNC5c. Notably, recent studies (Brignani et al., 2020; Dominici et al., 2017; Moreno-Bravo et al., 2019; Varadarajan et al., 2017) have revealed that the mechanisms by which Netrin-1 influences axon guidance are incredibly more diverse than previously thought.

We found that disrupting the pyramidal decussation does not prevent the further development of misguided corticospinal axons, which follow alternative routes in the spinal cord. These alternate trajectories might correspond to secondary or transitory routes for corticospinal branches during development (Bareyre et al., 2005; Gu et al., 2017). Strikingly, the innervation pattern of the gray matter was relatively well preserved despite the major alteration of CST lateralization and trajectories within the spinal cord. In line with these observations, our electrophysiological recordings further demonstrated that the misguided uncrossed corticospinal projections were functional.

We show that a specific alteration of CST decussation in the mouse is sufficient to recapitulate the CMM phenotype, i.e., abnormal symmetric movements in voluntary tasks, but not in locomotion. The *Shh::cre;Ntn1<sup>lox/lox</sup>* mice did not display any “hopping” behavior, i.e., synchronized activity of the

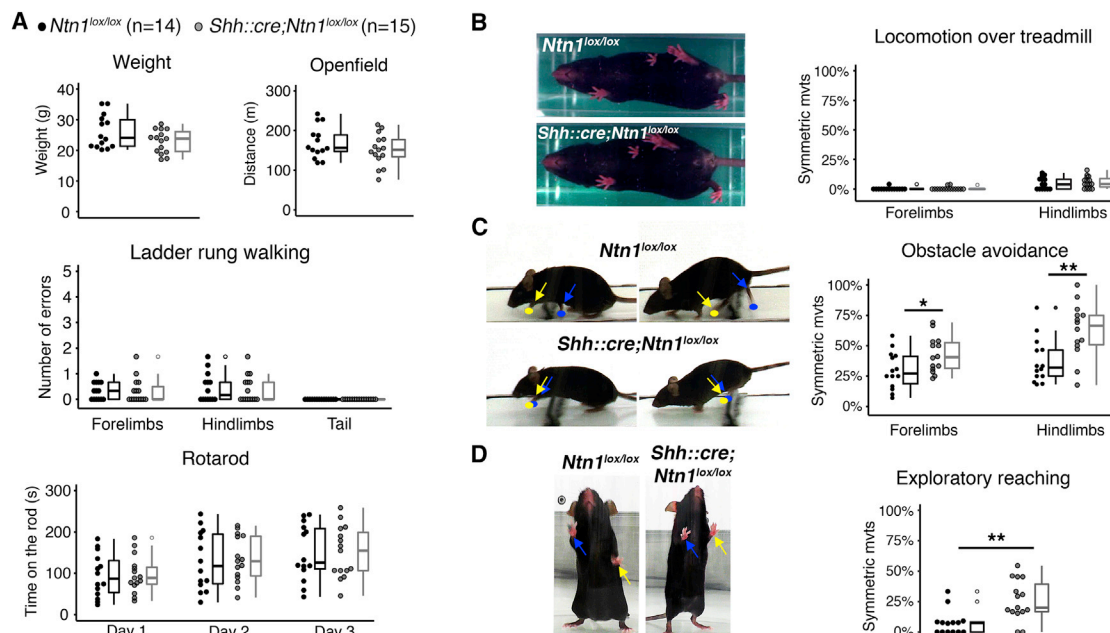

**Figure 4. Lateralization of voluntary movements is selectively altered in *Shh::cre;Ntn1*<sup>lox/lox</sup> mice**

(A) *Ntn1*<sup>lox/lox</sup> (black dots, n = 14) and *Shh::cre;Ntn1*<sup>lox/lox</sup> mice (gray dots, n = 15) have similar weight.  $p = 0.084$  (two-sided-t test). General motor behavior of *Shh::cre;Ntn1*<sup>lox/lox</sup> mice is not impaired. They perform as well as their control littermates in open field, on ladder rung task, and on rotarod.  $p_{\text{Openfield}} = 0.228$  (two-sided-t test),  $p_{\text{Ladder-Forelimbs}} = 0.7151$  (Mann-Whitney),  $p_{\text{Ladder-Hindlimbs}} = 0.8471$  (Mann-Whitney),  $p_{\text{Ladder-Tail}} = 1$  (Mann-Whitney),  $p_{\text{Rotarod-Day1}} = 0.911$ ;  $p_{\text{Rotarod-Day2}} = 0.874$ ;  $p_{\text{Rotarod-Day3}} = 0.966$  (two-sided-t test).

(B) Pictures of *Ntn1*<sup>lox/lox</sup> and *Shh::cre;Ntn1*<sup>lox/lox</sup> mice performing alternate movements with forelimbs and hindlimbs during treadmill locomotion. Low proportion of symmetric strides in *Shh::cre;Ntn1*<sup>lox/lox</sup> and *Ntn1*<sup>lox/lox</sup> mice,  $p_{\text{Forelimbs}} = 0.8131$ ,  $p_{\text{Hindlimbs}} = 0.7151$  (Mann-Whitney).

(C) Pictures of *Ntn1*<sup>lox/lox</sup> and *Shh::cre;Ntn1*<sup>lox/lox</sup> mice avoiding the obstacle with, respectively, alternate or synchronous movements of the forelimbs and hindlimbs. Yellow and blue dots/arrows indicate positions of left and right forepaws and hindpaws. *Shh::cre;Ntn1*<sup>lox/lox</sup> mice perform more symmetric movements with forelimbs and hindlimbs during obstacle avoidance task,  $p_{\text{Forelimbs}} = 0.03$ ,  $p_{\text{Hindlimbs}} = 0.003$  (two-sided t test).

(D) Pictures of *Ntn1*<sup>lox/lox</sup> and *Shh::cre;Ntn1*<sup>lox/lox</sup> mice performing, respectively, alternate or synchronous exploratory movements with the forepaws. *Shh::cre;Ntn1*<sup>lox/lox</sup> mice perform more symmetric movements during exploratory reaching task,  $p = 0.0021$  (Mann-Whitney). Data are presented as scatterplot and boxplot, with first and third quartiles, and median.

homologous limbs during locomotion. The absence of hopping in *Shh::cre;Ntn1*<sup>lox/lox</sup> mice during treadmill locomotion demonstrates that corticospinal projections are not involved in the lateralization of motor control during automatic behaviors, in keeping with previous findings (Serradj et al., 2014). The hopping behavior, reported in *Dcc*<sup>Kanga</sup> mice carrying a spontaneous viable mutation in *Dcc* (Finger et al., 2002), is indeed caused by an impairment of the spinal circuitry (Peng et al., 2018).

In humans, the three main disorders associated with abnormal pyramidal decussation are CMM, X-linked Kallmann syndrome, and Klippel-Feil syndrome (Welnarz et al., 2017b). Mirror movements are the common clinical sign of these syndromes and represent the only clinical manifestation of CMM. The anatomical and functional characterization of the corticospinal projections in our mouse model further indicates that the aberrant CST from one motor cortex projects either to the contralateral or to the ipsilateral side of the spinal cord rather than bilaterally and might not per se be able to transmit the motor command in a strictly symmetric manner. Interestingly, patients with CMM also have an abnormal bilateral pattern of activation in cortical motor areas during unilateral movement execution and preparation (Gallea et al., 2013; Welnarz et al., 2019). We hypothesize that this

abnormal activation pattern could reflect a strategy for adapting to aberrant CST projections, eventually resulting in the generation of mirror movements.

In summary, our work reveals a peculiar guidance mechanism for corticospinal axon midline crossing, with a critical dependence on floor plate Netrin-1. Disruption at the pyramidal decussation does not prevent further development of misguided corticospinal axons, which form an abnormal but functional ipsilateral tract. These aberrant corticospinal projections are associated to a selective increase of symmetric movements that can be related to mirror movements described in humans. To date, *Shh::cre;Ntn1*<sup>lox/lox</sup> mice are the only mouse model that recapitulates both the anatomical and behavioral impairments of CMM.

## STAR★METHODS

Detailed methods are provided in the online version of this paper and include the following:

- KEY RESOURCES TABLE
- RESOURCE AVAILABILITY
  - Lead contact

- Materials availability
- Data and code availability
- **EXPERIMENTAL MODEL AND SUBJECT DETAILS**
- **METHOD DETAILS**
  - Surgeries and tracer injections
  - Anterograde tracing of the CST with AAV9-CAG-tdTomato
  - Anterograde tracing of the CST with BDA
  - Retrograde tracing of descending tracts with Fluorogold
  - Retrograde tracing of neurons of the Dorsal Column Nuclei (DCN)
  - 2D analysis of brain and spinal cord
  - Immunohistochemistry and revelation of BDA
  - *In situ* hybridization (ISH)
  - Anatomical data acquisition
  - 3D analysis of the CST
  - Tissue preparation
  - Whole-Mount Immunostaining and Sample clearing
  - 3D imaging and image processing
  - 3D analysis of the inferior olive
  - Electrophysiology procedures
  - Intracortical stimulation of motor cortex
  - Electromyography recordings
  - Training and behavioral testing
- **QUANTIFICATION AND STATISTICAL ANALYSIS**
  - Corticospinal synapses in the gray matter
  - EMG analysis
  - Lateralization of the main motor tracts
  - Statistical analysis

## SUPPLEMENTAL INFORMATION

Supplemental Information can be found online at <https://doi.org/10.1016/j.celrep.2020.108654>.

## ACKNOWLEDGMENTS

This work was funded by grant ANR-18-CE16-0005-02 MOMIC, Fondation Desmarest, and Merz Pharma. We also acknowledge Sarujan Devakumaran (IBPS, France) for his contribution to experiments, France Lam for confocal imaging (IBPS, France), Morgane Belle (Institut de la Vision, France) for light-sheet imaging, Alexis Bemelmans (CEA, France) for producing the AAV9-CAG-tdTomato virus, Isabelle Caillé for reviewing the manuscript, and PHENO-ICMice (ICM, France) Core supported by 2 “Investissements d’avenir” (ANR-10-IAIHU-06 and ANR-11-INBS-0011-NeurATRIS), and the “Fondation pour la Recherche Médicale.”

## AUTHOR CONTRIBUTIONS

O.P., A.C., E.R., and I.D. designed the study. O.P. and M.-P.M. performed the behavioral analysis. O.P., Q.W., and M.-P.M. carried out the 2D anatomical analysis of the CST, and O.P. performed the 3D anatomical analysis. N.H. implemented the segmentation procedure for confocal images. M.-P.M. performed the genotyping. O.P. and F.M. performed the EMG recordings. N.S. carried out the FG injection. S.R.P. and J.A.M.-B. performed the *in situ* experiments. M.D. carried out the segmentation procedure for retrograde labeling and performed the statistical analyses. O.P., E.R., and I.D. wrote the manuscript. Q.W., F.M., N.H., S.R.P., J.A.M.-B., C.G., M.V., A.T., P.F., and A.C. substantially revised the manuscript.

## DECLARATION OF INTERESTS

The authors declare no competing interests.

Received: April 3, 2020

Revised: October 23, 2020

Accepted: December 22, 2020

Published: January 19, 2021

## REFERENCES

- Asante, C.O., and Martin, J.H. (2013). Differential joint-specific corticospinal tract projections within the cervical enlargement. *PLoS ONE* 8, e74454.
- Bareyre, F.M., Kerschensteiner, M., Misgeld, T., and Sanes, J.R. (2005). Transgenic labeling of the corticospinal tract for monitoring axonal responses to spinal cord injury. *Nat. Med.* 11, 1355–1360.
- Basista, M.J., and Yoshida, Y. (2020). Corticospinal Pathways and Interactions Underpinning Dexterous Forelimb Movement of the Rodent. *Neuroscience* 450, 184–191.
- Belle, M., Godefroy, D., Dominici, C., Heitz-Marchaland, C., Zelina, P., Hellal, F., Bradke, F., and Chédotal, A. (2014). A simple method for 3D analysis of immunolabeled axonal tracts in a transparent nervous system. *Cell Rep.* 9, 1191–1201.
- Bloch-Gallego, E., Ezan, F., Tessier-Lavigne, M., and Sotelo, C. (1999). Floor plate and netrin-1 are involved in the migration and survival of inferior olivary neurons. *J. Neurosci.* 19, 4407–4420.
- Brignani, S., Raj, D.D.A., Schmidt, E.R.E., Dündücü, Ö., Adolfs, Y., De Ruiter, A.A., Rybiczka-Tesulov, M., Verhagen, M.G., van der Meer, C., Broekhoven, M.H., et al. (2020). Remotely produced and axon-derived netrin-1 instructs GABAergic neuron migration and dopaminergic substantia nigra development. *Neuron* 107, 684–702.e9.
- Canty, A.J., and Murphy, M. (2008). Molecular mechanisms of axon guidance in the developing corticospinal tract. *Prog. Neurobiol.* 85, 214–235.
- Cohen, N.R., Taylor, J.S.H., Scott, L.B., Guillery, R.W., Soriano, P., and Furlay, A.J.W. (1998). Errors in corticospinal axon guidance in mice lacking the neural cell adhesion molecule L1. *Curr. Biol.* 8, 26–33.
- Dominici, C., Moreno-Bravo, J.A., Puiggros, S.R., Rappeneau, Q., Rama, N., Vieugue, P., Bernet, A., Mehlen, P., and Chédotal, A. (2017). Floor-plate-derived netrin-1 is dispensable for commissural axon guidance. *Nature* 545, 350–354.
- Faulkner, R.L., Low, L.K., Liu, X.-B., Coble, J., Jones, E.G., and Cheng, H.-J. (2008). Dorsal turning of motor corticospinal axons at the pyramidal decussation requires plexin signaling. *Neural Dev.* 3, 21.
- Finger, J.H., Bronson, R.T., Harris, B., Johnson, K., Przyborski, S.A., and Ackerman, S.L. (2002). The netrin 1 receptors Unc5h3 and Dcc are necessary at multiple choice points for the guidance of corticospinal tract axons. *J. Neurosci.* 22, 10346–10356.
- Gallea, C., Popa, T., Hubsch, C., Valabregue, R., Brochard, V., Kundu, P., Schmitt, B., Bardinet, E., Bertasi, E., Flamand-Roze, C., et al. (2013). RAD51 deficiency disrupts the corticospinal lateralization of motor control. *Brain* 136, 3333–3346.
- Gilles, J.-F., Dos Santos, M., Boudier, T., Bolte, S., and Heck, N. (2017). DiAna, an ImageJ tool for object-based 3D co-localization and distance analysis. *Methods* 115, 55–64.
- Gu, Z., Kalambogias, J., Yoshioka, S., Han, W., Li, Z., Kawasawa, Y.I., Pocharedy, S., Li, Z., Liu, F., Xu, X., et al. (2017). Control of species-dependent cortico-motoneuronal connections underlying manual dexterity. *Science* 357, 400–404.
- Gul-Mohammed, J., Arganda-Carreras, I., Andrey, P., Galy, V., and Boudier, T. (2014). A generic classification-based method for segmentation of nuclei in 3D images of early embryos. *BMC Bioinformatics* 15, 9.
- Harfe, B.D., Scherz, P.J., Nissim, S., Tian, H., McMahon, A.P., and Tabin, C.J. (2004). Evidence for an expansion-based temporal Shh gradient in specifying vertebrate digit identities. *Cell* 118, 517–528.



- Kim, D., and Ackerman, S.L. (2011). The UNC5C netrin receptor regulates dorsal guidance of mouse hindbrain axons. *J. Neurosci.* **31**, 2167–2179.
- Kubota, C., Nagano, T., Baba, H., and Sato, M. (2004). Netrin-1 is crucial for the establishment of the dorsal column-medial lemniscal system. *J. Neurochem.* **89**, 1547–1554.
- Lemon, R.N. (2008). Descending pathways in motor control. *Annu. Rev. Neurosci.* **31**, 195–218.
- Li, X., and Lufkin, T. (2000). Cre recombinase expression in the floorplate, notochord and gut epithelium in transgenic embryos driven by the *Hoxa-1* enhancer III. *Genesis* **26**, 121–122.
- Marcos, S., Backer, S., Causeret, F., Tessier-Lavigne, M., and Bloch-Gallego, E. (2009). Differential roles of Netrin-1 and its receptor DCC in inferior olivary neuron migration. *Mol. Cell. Neurosci.* **41**, 429–439.
- Méneret, A., Welniarz, Q., Trouillard, O., and Roze, E. (2015). Congenital mirror movements: from piano player to opera singer. *Neurology* **84**, 860.
- Méneret, A., Franz, E.A., Trouillard, O., Oliver, T.C., Zagar, Y., Robertson, S.P., Welniarz, Q., Gardner, R.J.M., Gallea, C., Srour, M., et al. (2017). Mutations in the netrin-1 gene cause congenital mirror movements. *J. Clin. Invest.* **127**, 3923–3936.
- Moreno-Bravo, J.A., Roig Puiggros, S., Mehlen, P., and Chédotal, A. (2019). Synergistic Activity of Floor-Plate- and Ventricular-Zone-Derived Netrin-1 in Spinal Cord Commissural Axon Guidance. *Neuron* **101**, 625–634.e3.
- Peng, J., Ferent, J., Li, Q., Liu, M., Da Silva, R.V., Zeilhofer, H.U., Kania, A., Zhang, Y., and Charron, F. (2018). Loss of *Dcc* in the spinal cord is sufficient to cause a deficit in lateralized motor control and the switch to a hopping gait. *Dev. Dyn.* **247**, 620–629.
- Renier, N., Adams, E.L., Kirst, C., Wu, Z., Azevedo, R., Kohl, J., Autry, A.E., Kadir, L., Umadevi Venkataraju, K., Zhou, Y., et al. (2016). Mapping of Brain Activity by Automated Volume Analysis of Immediate Early Genes. *Cell* **165**, 1789–1802.
- Rünker, A.E., Little, G.E., Suto, F., Fujisawa, H., and Mitchell, K.J. (2008). Semaphorin-6A controls guidance of corticospinal tract axons at multiple choice points. *Neural Dev.* **3**, 34.
- Serafini, T., Colamarino, S.A., Leonardo, E.D., Wang, H., Beddington, R., Skarnes, W.C., and Tessier-Lavigne, M. (1996). Netrin-1 is required for commissural axon guidance in the developing vertebrate nervous system. *Cell* **87**, 1001–1014.
- Serradj, N., Paixão, S., Sobocki, T., Feinberg, M., Klein, R., Kullander, K., and Martin, J.H. (2014). EphA4-mediated ipsilateral corticospinal tract misprojections are necessary for bilateral voluntary movements but not bilateral stereotypic locomotion. *J. Neurosci.* **34**, 5211–5221.
- Starkey, M.L., Barritt, A.W., Yip, P.K., Davies, M., Hamers, F.P.T., McMahon, S.B., and Bradbury, E.J. (2005). Assessing behavioural function following a pyramidotomy lesion of the corticospinal tract in adult mice. *Exp. Neurol.* **195**, 524–539.
- Sun, K.L.W., Correia, J.P., and Kennedy, T.E. (2011). Netrins: versatile extracellular cues with diverse functions. *Development* **138**, 2153–2169.
- Varadarajan, S.G., Kong, J.H., Phan, K.D., Kao, T.-J., Panaitof, S.C., Cardin, J., Eltzschig, H., Kania, A., Novitch, B.G., and Butler, S.J. (2017). Netrin1 Produced by Neural Progenitors, Not Floor Plate Cells, Is Required for Axon Guidance in the Spinal Cord. *Neuron* **94**, 790–799.e3.
- Welniarz, Q., Dusart, I., Gallea, C., and Roze, E. (2015). One hand clapping: lateralization of motor control. *Front. Neuroanat.* **9**, 75.
- Welniarz, Q., Morel, M.-P., Pourchet, O., Gallea, C., Lamy, J.-C., Cincotta, M., Doulazmi, M., Belle, M., Méneret, A., Trouillard, O., et al. (2017a). Non cell-autonomous role of DCC in the guidance of the corticospinal tract at the midline. *Sci. Rep.* **7**, 410.
- Welniarz, Q., Dusart, I., and Roze, E. (2017b). The corticospinal tract: Evolution, development, and human disorders. *Dev. Neurobiol.* **77**, 810–829.
- Welniarz, Q., Gallea, C., Lamy, J.-C., Méneret, A., Popa, T., Valabregue, R., Béranger, B., Brochard, V., Flamand-Roze, C., Trouillard, O., et al. (2019). The supplementary motor area modulates interhemispheric interactions during movement preparation. *Hum. Brain Mapp.* **40**, 2125–2142.
- Wu, Z., Makihara, S., Yam, P.T., Teo, S., Renier, N., Balekoglu, N., Moreno-Bravo, J.A., Olsen, O., Chédotal, A., Charron, F., and Tessier-Lavigne, M. (2019). Long-Range Guidance of Spinal Commissural Axons by Netrin1 and Sonic Hedgehog from Midline Floor Plate Cells. *Neuron* **101**, 635–647.e4.

## STAR★METHODS

### KEY RESOURCES TABLE

| REAGENT or RESOURCE                                                 | SOURCE                                | IDENTIFIER                                                                                                    |
|---------------------------------------------------------------------|---------------------------------------|---------------------------------------------------------------------------------------------------------------|
| <b>Antibodies</b>                                                   |                                       |                                                                                                               |
| rabbit anti-PKC $\gamma$                                            | Santa Cruz                            | Cat# sc-211, RRID:AB_632234                                                                                   |
| guinea-pig anti-VGLUT1                                              | Millipore                             | Cat# AB5905, RRID:AB_2301751                                                                                  |
| goat anti-ChAT                                                      | Millipore                             | Cat# AB144P, RRID:AB_2079751                                                                                  |
| rabbit anti-DsRED                                                   | Living Colors                         | Cat# 632496, RRID:AB_10013483                                                                                 |
| goat anti-FOXP2                                                     | Abcam                                 | Abcam Cat# ab1307, RRID:AB_1268914                                                                            |
| <b>Bacterial and virus strains</b>                                  |                                       |                                                                                                               |
| AAV9-CAG-tdTomato                                                   | MIRCen                                | N/A                                                                                                           |
| <b>Experimental models: organisms/strains</b>                       |                                       |                                                                                                               |
| Mouse: Ntn1 flox (conditional knockout)                             | <a href="#">Dominici et al., 2017</a> | N/A                                                                                                           |
| Mouse: B6.Cg-Shhtm1(EGFP/cre)Cjt/J                                  | Jackson Laboratories                  | Cat# JAX:005622; RRID:IMSR_JAX:005622                                                                         |
| Mouse: B6.Cg-Gt(ROSA)26Sortm9(CAG-tdTomato)Hze/J                    | Jackson Laboratories                  | Cat# JAX:007909; RRID:IMSR_JAX:007909                                                                         |
| Mouse: Tg(Hoxa1-cre)1Tlu ; (EIII::cre)                              | <a href="#">(Li and Lufkin, 2000)</a> | MGI Cat# 5000124, RRID:MGI:5000124                                                                            |
| <b>Oligonucleotides</b>                                             |                                       |                                                                                                               |
| <i>In situ</i> probe for Ntn1 exon3: Forward 5-ATGATGCGCGCTGTGTGG-3 | <a href="#">Dominici et al., 2017</a> | N/A                                                                                                           |
| <i>In situ</i> probe for Ntn1 exon3: Reverse 5-AGCTCCGAGTCGCTCTCG-3 | <a href="#">Dominici et al., 2017</a> | N/A                                                                                                           |
| <b>Software and algorithms</b>                                      |                                       |                                                                                                               |
| Adobe Photoshop CS6/CC                                              | Adobe                                 | RRID:SCR_014199                                                                                               |
| Adobe Illustrator CS5/CC                                            | Adobe                                 | RRID:SCR_010279                                                                                               |
| Inspector Pro                                                       | LaVision BioTec                       | N/A                                                                                                           |
| Imaris x64 v8                                                       | Oxford Instruments                    | RRID: SCR_007370;<br><a href="https://imaris.oxinst.com/">https://imaris.oxinst.com/</a>                      |
| Leica LAS X software                                                | Leica Microsystems                    | RRID:SCR_013673                                                                                               |
|                                                                     | NIH                                   | RRID:SCR_003070 <a href="https://imagej.nih.gov/ij/download.html">https://imagej.nih.gov/ij/download.html</a> |
| iMovie                                                              | Apple                                 | <a href="https://support.apple.com/downloads/imovie">https://support.apple.com/downloads/imovie</a>           |
| Spike2                                                              | CED                                   | RRID:SCR_000903                                                                                               |

### RESOURCE AVAILABILITY

#### Lead contact

Further information and requests for resources and reagents should be directed to and will be fulfilled by the Lead Contact, Isabelle Dusart ([isabelle.dusart@upmc.fr](mailto:isabelle.dusart@upmc.fr)).

#### Materials availability

This study did not generate new unique reagents.

#### Data and code availability

The data that supports the findings of this study are available from the lead author upon reasonable request.

## EXPERIMENTAL MODEL AND SUBJECT DETAILS

The following mouse strains were used: *Shh::cre* (Jackson laboratory), *Ntn1<sup>lox</sup>* (given by P. Melhen, Lyon) and *Ai9 RosatdTomato* (*Rosa<sup>Tom</sup>*; Jackson lab). *Shh::cre* and *Ntn1<sup>lox</sup>* were previously described in (Harfe et al., 2004) and (Dominici et al., 2017) respectively. They were maintained on a C57BL/6J background and were genotyped by PCR as described previously. Adult (2–4 months) and embryonic (E14 and E18 stages) mice of either sex were used. All animal procedures were approved by the Regional Animal Experimentation Ethics Committee C2EA-05 Charles Darwin and the French Ministère de l'éducation nationale de l'enseignement supérieur et de la recherche (projects N°01558.03, 2018042815492966). We strictly performed these approved procedures.

## METHOD DETAILS

### Surgeries and tracer injections

Buprenorphine (Buprecare) was injected subcutaneously 30 min before the surgery at 0.1 mg/kg. During surgeries and injections, mice were anesthetized with isoflurane and body temperature was maintained at 37°C by a heating pad.

### Anterograde tracing of the CST with AAV9-CAG-tdTomato

2-month old adult mice (7 *Ntn1<sup>lox/lox</sup>* and 7 *Shh::cre;Ntn1<sup>lox/lox</sup>* mice) were placed in a stereotaxic frame (Kopf Instrument) and lidocaine (Xylovet) was injected subcutaneously at 3 mg/kg 5 min before the surgery. AAV9-CAG-tdTomato (MIRGen) was diluted in saline to a final titer of  $1.7 \cdot 10^{13}$  GC/mL. Four injections of 0.5  $\mu$ L of this AAV solution were administered at 1.6 nL/s in the left motor cortex using the following coordinates: 0.75 mm rostral to Bregma, 1 and 2 mm lateral, at a depth of 1 mm for the 2 first injections and 0.25 mm caudal to Bregma, 1 and 2 mm lateral, at a depth of 1 mm for the 2 last injections. At each injection point, the needle was left in place for 2 min before and 4 min after the injection to avoid leakage. After surgery, the wound was cleansed and the skin sutured. Analysis was carried out 3 weeks after injection.

### Anterograde tracing of the CST with BDA

Unilateral injections of biotinylated dextran amine (BDA, MW 10 000, SIGMA) were performed in the left motor cortex of 2-month old adult mice (4 *Ntn1<sup>lox/lox</sup>*, 1 *Shh::cre*, 1 *Shh::cre;Ntn1<sup>lox/+</sup>* and 5 *Shh::cre;Ntn1<sup>lox/lox</sup>* mice) following a procedure similar to the AAV9-CAG-tdTomato injection procedure. BDA was diluted in saline to a final concentration of 10%. Six injections of 0.2  $\mu$ L were administered at 1.6 nL/s in the left motor cortex using the following coordinates: 1 mm rostral to Bregma, 1 and 2 mm lateral, at a depth of 1 mm for the first couple of injections, 0.25 mm caudal to Bregma, 1 and 2 mm lateral, at a depth of 1 mm for the 2 s couple of injections and 1 mm caudal to Bregma, 1 and 2 mm lateral, at a depth of 1 mm for the last couple of injections. At each injection point, the needle was left in place for 3 min before and after the injection to avoid leakage. After surgery, the wound was cleansed and the skin sutured. Analysis was carried out 2 weeks after injection.

### Retrograde tracing of descending tracts with Fluorogold

Retrograde tracing was performed unilaterally on 2-month-old adult mice. 13 *Ntn1<sup>lox/lox</sup>* and 18 *Shh::cre;Ntn1<sup>lox/lox</sup>* mice were injected but only 5 *Ntn1<sup>lox/lox</sup>* and 6 *Shh::cre;Ntn1<sup>lox/lox</sup>* mice were retained for the analysis after verification of absence of leakage of the tracer across the midline, see the QUANTIFICATION section). The lower cervical spinal cord was exposed and 0.4–0.6  $\mu$ L of a 4% Fluorogold (Fluorochrome) solution in 0.9% saline was injected at 2 nL/s on the right side of C6–C7. After the injection, the needle was kept in place for an additional 3 min to avoid leakage of tracer. The wound was closed by suturing the paraspinal muscles and skin. Carprofène (rimadyl) was injected subcutaneously at 5 mg/kg on the wound and Buprenorphine (Buprecare, 1 mg/kg per os) was added to the drinking water. Analysis was carried out 2 weeks after injection.

### Retrograde tracing of neurons of the Dorsal Column Nuclei (DCN)

2-month-old adult mice (3 *Ntn1<sup>lox/lox</sup>* and 3 *Shh::cre;Ntn1<sup>lox/lox</sup>* mice) were placed in a stereotaxic frame (Kopf Instrument) and lidocaine (Xylovet) was injected subcutaneously at 3 mg/kg 5 min before the surgery. A 4% Fluorogold (Fluorochrome) solution in 0.9% saline was injected at 1.6 nL/s unilaterally in the left thalamus of the mice, using the following coordinates: 2 mm rostral to Bregma, 1.8 mm lateral, at a depth of 3.5 mm for the first injection, and 1.7 mm rostral to Bregma, 1.8 mm lateral, at a depth of 3.6 mm for the second injection. At each injection point, the needle was left in place for 4 min after the injection to avoid leakage. After surgery, the wound was cleansed and the skin sutured. Analysis was carried out 3 weeks after injection.

In all cases, mice were killed by an intraperitoneal injection of Euthasol (150 mg/kg) followed by perfusion with 4% paraformaldehyde in 0.12 M phosphate buffer, pH 7.4 (PFA).

### 2D analysis of brain and spinal cord

After perfusion, brains and spinal cords were collected and post-fixed in the same fixative for 4 h at 4°C. Samples were cryoprotected in a solution of 20% sucrose in 0.12 M phosphate buffer (pH 7.4). Brains were frozen in isopentane at –35°C, and stored at –80°C.

until processing. Spinal cords were embedded in Tissue-Teck OCT (VWR, Fontenay sous bois, France), frozen in isopentane at  $-30^{\circ}\text{C}$  and stored at  $-20^{\circ}\text{C}$  until processing. Samples were cut at  $30\ \mu\text{m}$  in coronal plane with a cryostat (Leica Microsystems) and serially mounted on slides.

### Immunohistochemistry and revelation of BDA

Sections were washed in PBS and blocked for 1 h with a PBSGT solution (1X PBS, 0.2% gelatin, 0.25% Triton X-100) containing 0.1 M lysine (Merck). Sections were then incubated overnight at room temperature in the PBSGT solution with the following primary antibody: rabbit anti-PKC $\gamma$  (1/100, Santa Cruz, sc-211), goat anti-FOXP2 (1/500, Abcam ab1307), guinea-pig anti-VGLUT1 (1/3000, Millipore, AB5905), goat anti-ChAT (1/300, Millipore, AB144P), rabbit anti-DsRED (1/500, Living Colors, 632496), followed by 2h incubation in species-specific secondary antibody directly conjugated to fluorophores (Cy3 or Cy5 from Jackson ImmunoResearch or Alexa Fluor 488 from Invitrogen). Sections were mounted in Mowiol (Calbiochem, La Jolla, CA).

BDA labeling was revealed by streptavidin conjugated to the Cy5 fluorophore (1/400, Invitrogen) that was added to the primary antibody solution.

### In situ hybridization (ISH)

#### Riboprobe synthesis

cDNAs encoding mouse *Ntn1* exon 3 were used. The *in vitro* transcription was carried out by using the Promega kit (Promega, Charbonnières, France) and probes were labeled with digoxigenin-11-d-UTP (Roche Diagnostics, Indianapolis, IN).

#### Tissue preparation

E14 embryos (3 *Ntn1*<sup>lox/lox</sup> and 3 *Shh::cre;Ntn1*<sup>lox/lox</sup>) and E18/P0 mice (2 *Ntn1*<sup>lox/lox</sup> and 3 *Shh::cre;Ntn1*<sup>lox/lox</sup>) were fixed by immersion in 4% PFA over night at  $4^{\circ}\text{C}$ . Samples were cryoprotected in a solution of 20% sucrose in 0.12M phosphate buffer (pH7.4), frozen in isopentane at  $-35^{\circ}\text{C}$  and then cut in coronal plane at  $20\ \mu\text{m}$  with a cryostat (Leica).

#### In situ hybridization protocol

Brain sections were postfixed for 10 min in 4% PFA, washed in PBS, treated with proteinase K (20  $\mu\text{g}/\text{ml}$ ; Invitrogen) for 2 min, post-fixed for 5 min in 4% PFA, washed in PBS, acetylated, washed in PBS 1% Triton X-100. Slides were incubated 2 hours at room temperature with hybridization buffer (50% formamide, 5x SSC, 5x Denhardt's, 250  $\mu\text{g}/\text{ml}$  yeast tRNA, and 500  $\mu\text{g}/\text{ml}$  herring sperm DNA, pH7.4). Then, tissue sections were hybridized overnight at  $72^{\circ}\text{C}$  with riboprobes (1/200). After hybridization, sections were rinsed for 2 hours in 0.2x SSC at  $72^{\circ}\text{C}$ , and blocked in 0.1 M Tris, pH 7.5, 0.15 M NaCl (B1) containing 10% normal goat serum (NGS) for 1 hour at room temperature. After blocking, slides were incubated overnight at room temperature with anti-DIG antibody conjugated with the alkaline phosphatase (1/5,000, Roche Diagnostics) in B1 containing 1% NGS. After washing in B1 buffer, the alkaline phosphatase activity was detected by using nitroblue tetrazolium chloride (337.5  $\mu\text{g}/\text{ml}$ ) and 5-bromo-4-chloro-3-indolyl phosphate (175  $\mu\text{g}/\text{ml}$ ) (Roche Diagnostics). Sections were mounted in Mowiol.

### Anatomical data acquisition

Images of PKC $\gamma$  staining, BDA CST tracing, virus-labeled corticospinal innervation of cervical and lumbar spinal cord and retrograde tracing were acquired on Leica DMR microscope, under identical conditions of magnification, illumination and exposure. Gray level images were captured using MetaView software (Universal Imaging Corporation, Roper Scientific, France). *In situ* hybridization slides were scanned with a Nanozoomer (Hamamatsu). Brightness and contrast were adjusted using Adobe Photoshop.

For corticospinal synapses in the gray matter, a Leica SP5 confocal microscope equipped with a 63x objective (oil immersion, 1.4 Numerical Aperture) was used to acquire image stacks with pixel size of 160 nm and z-step of 300 nm. Image stacks of VGLUT1 were denoised with median filter.

### 3D analysis of the CST

2 *Ntn1*<sup>lox/lox</sup> and 3 *Shh::cre;Ntn1*<sup>lox/lox</sup> mice were injected unilaterally with AAV9-CAG-tdTomato virus in the motor cortex (cf. Anterograde tracing of the CST).

### Tissue preparation

After perfusion, brains and spinal cords were collected and post-fixed in the same fixative overnight at  $4^{\circ}\text{C}$ . Samples were pretreated with methanol before immunostaining. Samples were dehydrated with 50% (1h30), 80% (1h30) methanol/PBS and 100% methanol for 2x1h30. Samples were chilled at  $4^{\circ}\text{C}$  and bleached overnight in 6%  $\text{H}_2\text{O}_2$  in methanol at  $4^{\circ}\text{C}$ . Samples were rinsed in methanol, and rehydrated with 100% (2x1h30), 80% (1h30), 50% (1h30) methanol/PBS and PBS 1X (1h30).

### Whole-Mount Immunostaining and Sample clearing

Samples were first incubated at room temperature on a rotating shaker in a solution (PBSGT) of PBS 1X containing 0.2% gelatin and 0.5% Triton X-100 (Sigma-Aldrich) for 3 days. Samples were next transferred to PBSGT containing 0.1% saponin and anti-DsRED (1/500, Living Colors, 632496) and placed at  $37^{\circ}\text{C}$  with rotation for 10 days. This was followed by six washes of 1h in PBSGT at room temperature. Next, samples were incubated in PBSGT containing 0.1% saponin and a donkey anti-rabbit conjugated to the Cy3 fluorophore (1/200, Jackson Immuno Research) for 2 days at  $37^{\circ}\text{C}$  with rotation. After six washes of 1h in PBSGT at room temperature,

samples were cleared using a methanol clearing protocol, adapted from iDISCO+ protocol (Renier et al., 2016) found at <https://transparent-human-embryo.com>.

### 3D imaging and image processing

3D imaging was performed with an ultramicroscope using Inspector Pro software (LaVision BioTec). 3D volume and movies were generated using Imaris software. Crystals that might form from secondary antibody precipitation were eliminated using the surface tool by creating a mask around each volume.

### 3D analysis of the inferior olive

#### Tissue preparation

3 *Ntn1<sup>lox/lox</sup>* and 4 *Shh::cre;Ntn1<sup>lox/lox</sup>* embryos were collected at E18 and fixed by intra-cardiac perfusion with 4% paraformaldehyde in 0.12 M phosphate buffer, pH 7.4 (PFA). After perfusion, brains were collected and post-fixed in the same fixative overnight at 4°C.

#### Whole-Mount Immunostaining and Sample clearing

Samples were first incubated at room temperature on a rotating shaker in a solution (PBSGT) of PBS 1X containing 0.2% gelatin and 0.5% Triton X-100 (Sigma-Aldrich) for 3 days. Samples were next transferred to PBSGT containing 0.1% saponin and anti-Foxp2 (1/500, abcam, ab1307) and placed at 37°C with rotation for 12 days. This was followed by six washes of 1 h in PBSGT at room temperature. Next, samples were incubated in PBSGT containing 0.1% saponin and a donkey anti-goat conjugated to the Cy3 fluorophore (1/600, Jackson Immuno Research) for 1 day at 37°C with rotation. After six washes of 1 h in PBSGT at room temperature, samples were cleared using the 3DISCO protocol (Belle et al., 2014) found at <https://transparent-human-embryo.com>.

#### 3D imaging and morphological analysis of the inferior olive

3D imaging was performed with an ultramicroscope using Inspector Pro software (LaVision BioTec). 3D volumes were analyzed using Imaris software. Superimposition of 3D volumes of Foxp2-labeled inferior olive of *Ntn1<sup>lox/lox</sup>* and *Shh::cre;Ntn1<sup>lox/lox</sup>* mice allowed to compare the morphology of this structure between the 2 genotypes. Virtual sectioning of the inferior olives was performed using the oblique slicer tool to further compare the position of the different inferior olive subnuclei between *Ntn1<sup>lox/lox</sup>* and *Shh::cre;Ntn1<sup>lox/lox</sup>* mice. Movies were generated using Imaris software.

### Electrophysiology procedures

The electrophysiology protocol was performed on 5 *Ntn1<sup>lox/lox</sup>* and 9 *Shh::cre;Ntn1<sup>lox/lox</sup>* adult mice from the group of animals that underwent the behavioral tests.

#### Intracortical stimulation of motor cortex

Anesthesia was induced with intraperitoneal injection of chloral hydrate (400mg/kg) to render the animal unresponsive to paw pinch. Animals were then placed in a stereotaxic frame. Body temperature was maintained at 37°C by a heating pad. A craniotomy was made over the hindlimb area of M1.

We used home-made bipolar tungsten electrodes (250  $\mu$ m apart, impedance = 6.5K $\Omega$ ). Electrode penetration was made perpendicular to the pial surface at 1mm depth. The stimulation was applied in the hindlimb motor area (between 1 to 2.0mm lateral to bregma, between 0.5 to 1.5 caudal to bregma).

10 to 20 stimulations (40ms duration train of 0.6ms monophasic pulses at 350Hz) were delivered every 10 s by a constant current stimulator (Digitimer, Ltd). For a given site, we started at low current and increased the amplitude until the lowest current that consistently produced a motor effect (in > 50% of trials). A maximal current of 25mA was used; if no response was evoked at this intensity, the site was considered nonresponsive and the electrode was moved to another site (within the hindlimb motor area of the same hemisphere). The same procedure was then performed on the motor cortex of the opposite hemisphere.

#### Electromyography recordings

We recorded electromyographic (EMG) responses from the gastrocnemii muscles bilaterally evoked by the stimulation of one motor cortex. 2 homemade silver recording electrodes were inserted 5mm apart in left and right gastrocnemii muscles. The proper placement of the electrodes was controlled by noting increased EMG activity upon passive plantar flexion. The EMG recordings were made with a differential AC amplifier and then digitized at 12.5 kHz and analyzed with Spike2 program (CED). Raw EMG was smoothed and rectified after recording with Spike 2.

### Training and behavioral testing

The first behavioral study (described in Figure 4) was conducted on 15 *Shh::cre;Ntn1<sup>lox/lox</sup>* and 14 *Ntn1<sup>lox/lox</sup>* control mice aged between 8 and 12 weeks; a second behavioral study (mentioned in Figure S2C) was conducted as a control experiment suggested by the reviewers, on 12 *Elll::cre;Ntn1<sup>lox/lox</sup>* and 13 *Ntn1<sup>lox/lox</sup>* control mice aged between 8 and 12 weeks; This second behavioral study comprised only the partial SHIRPA protocol, the openfield, the treadmill and the exploratory reaching experiment. For both studies, male and female mice were used. We verified that the repartition of male and female did not differ between groups ( $\chi^2$ ,  $p_{\text{group1}} = 0.893$ ;  $p_{\text{group2}} = 0.561$ ). All the behavioral tests were performed blindly to the genotype. For the first three days, the mice were habituated to being handled by the experimenters in order to limit stress. Mice were then tested with a partial SHIRPA protocol (grasping,

clapping and auditory tests were performed, and whisker state was evaluated) in order to rule out major neurological abnormalities.

#### **Open field**

The open field test was used to evaluate spontaneous activity and locomotion: mice were placed in the center of a 0.25-m<sup>2</sup> arena and allowed to explore freely for 5 minutes. During this time, they were tracked and recorded with a camera fixed above the arena, and the total walking distance was calculated with Topscan software.

#### **Ladder**

The ladder test apparatus (Locotronic) consists of a 124 cm × 8 cm corridor with a floor composed of 78 bars each 1 cm apart. The mice were made to cross the corridor and the number of slips of the forelimbs, hindlimbs and tail was automatically detected by 158 infrared captors placed on the corridor walls (sampling frequency 1000 Hz). The test was repeated three times for each mouse and the sum of errors throughout the three trials was calculated. This test evaluates the precision and coordination of limb positioning.

#### **Treadmill**

Mice were placed on a transparent treadmill (14 cm × 6 cm) moving at 12 cm/s. After a short training session, the mice had to run for ten seconds, during which period the positioning of their paws was recorded by a camera fixed under the apparatus. The proportion of symmetric and asymmetric strides was calculated after excluding frames in which the mouse was not running.

#### **Rotarod**

The accelerating Rotarod (BIOSEB) consists of a horizontal rod 3 cm in diameter, turning on its longitudinal axis. The training phase consisted of walking on the rod at a rotational speed varying from 4 to 40 rpm for one minute. The mice were then subjected to four trials in which the speed of rotation increased gradually from 4 rpm to 40 rpm over 5 min. Time spent on the rod was recorded and averaged for the 4 trials. The test was repeated three days in a row with the same procedure, except that the training session was performed only on the first day.

#### **Reaching exploratory behavior**

When placed in a new environment, as a glass cylinder, mice engage in “reaching” exploratory behavior, in which they contact walls with their forepaws (Serradj et al., 2014; Starkey et al., 2005). This contact can be made with the two paws simultaneously (symmetric movement) or independently (asymmetric). Ten reaching movements were recorded with a video camera and then examined frame-by-frame to calculate the number of asymmetric and symmetric movements.

#### **Obstacle avoidance test**

This test allows to evaluate adaptative locomotion (Serradj et al., 2014; Starkey et al., 2005). It consists in placing the mouse on an obstructed treadmill, on which 2 obstacles were mounted one small (5mm height) and one large (10mm). The treadmill was moving at 10 cm/s for 2 minutes (acclimatization phase) and 15 cm/s for the 2 following minutes. The mice were accustomed to the task for two days and were recorded with a video camera on the third day. The number of alternate steps (asymmetric movements) and hops (symmetric movements) over the obstacles was calculated for both the forelimbs and the hindlimbs during the 15cm/s session. If the mouse was pausing before avoiding the obstacle, the movement was not considered in the analysis.

### **QUANTIFICATION AND STATISTICAL ANALYSIS**

p values and samples sizes can be found in the figure legends.

#### **Corticospinal synapses in the gray matter**

Distribution analysis of corticospinal synapses in the gray matter were carried out from confocal images of spinal cord sections of 7 *Ntn1<sup>lox/lox</sup>* and 7 *Shh::cre;Ntn1<sup>lox/lox</sup>* mice injected unilaterally with AAV9-CAG-tdTomato virus in the motor cortex.

At cervical and lumbar enlargement, the majority of corticospinal terminations were detected in the medial half of the laminae III-V (defined as the “dorsal” region) and the medial half of the laminae V-VII (defined as the “intermediate” region) in both *Ntn1<sup>lox/lox</sup>* and *Shh::cre;Ntn1<sup>lox/lox</sup>* mice. For each region of interest (ROI), three image stacks of 80 microns width and 8 microns depth were acquired on the ipsilateral and contralateral sides of the gray matter.

Segmentation was performed in three-dimensions (3D) by iterative thresholding and MESR algorithm (Gilles et al., 2017; Gul-Mohammed et al., 2014). User-defined constraints (i.e., minimum intensity threshold, minimum and maximum volumes) were included in the procedure. The segmentation was automated with macros calling functions from the ImageJ plugin 3DImageSuite. Colocalization was detected in 3D by 3DImageSuite ImageJ plugin as overlap between segmented objects from the two channels.

For each section, we calculated the density of colocalization per ROI as the average of colocalization densities of the 3 sampling regions from this ROI. The densities of colocalization per ROI of the two consecutive sections were then averaged. The relative distribution of colocalization among the 4 ROIs (ipsilateral dorsal, ipsilateral intermediate, contralateral dorsal, contralateral intermediate) was obtained by dividing the colocalization density of each ROI by the sum of the densities of the 4 ROIs. This allowed us to compare the relative distribution of the corticospinal synapses (VGLUT1/Tomato colocalization) among the 4 ROIs between animals independently from tracing differences.

#### **EMG analysis**

The electrophysiology protocol was performed on 5 *Ntn1<sup>lox/lox</sup>* and 9 *Shh::cre;Ntn1<sup>lox/lox</sup>* adult mice from the group of animals that underwent the behavioral tests. Data are presented as mean of EMG obtained from 10 to 20 stimulations of one or the two motor



cortices (7 out of 14 mice). Proportion of each type of responses (“strictly” contralateral, “strictly” ipsilateral and bilateral) to stimulation are calculated on effective motor contraction only.

### Lateralization of the main motor tracts

We first verified that the retrograde tracer FluoroGold (FG) was correctly injected on the right side of the cervical enlargement (C6) and that there was no leakage of FG across the midline. Samples from 5 *Ntn1<sup>lox/lox</sup>* and 6 *Shh::cre;Ntn1<sup>lox/lox</sup>* mice fitted these criteria (35% of the injected mice) and were included in the subsequent analysis. The structures of interest, i.e., motor cortex, red nucleus, medullary reticular formation, pontine reticular formation, parhypothalamic nucleus, paralemniscal nucleus, vestibular nuclei, Barrington’s nucleus, were captured on 2 to 5 consecutive sections (depending on the structure) with a Leica DMR microscope, under identical conditions of magnification, illumination and exposure. FG labeled neurons were segmented with ImageJ, using a selective threshold. After thresholding, we applied two algorithms of mathematical morphology: SKIZ (Skeleton by Influence Zones) and Watershed. At this step, animals for which fewer than 90 FG-labeled neurons could be segmented for one structure of interest were excluded from the analysis of this particular structure. For the other cases, the number of segmented neurons on each side (ipsilateral or contralateral to the injection site) of each structure was reported and the ratio of ipsilateral segmented neurons over the total number of segmented neurons was calculated for each structure.

### Statistical analysis

Data were analyzed with SPSS statistical software version 24.0 (Chicago, Illinois, USA). Normality in the variable distributions was assessed by the Shapiro-Wilk test. Furthermore, the Levene’s test was performed to probe homogeneity of variances across groups. Variables that failed the Shapiro-Wilk or the Levene’s test were analyzed with nonparametric statistics using the one-way Kruskal–Wallis analysis of variance on ranks followed by Nemenyi test post hoc and Mann–Whitney rank sum tests for pairwise multiple comparisons. Correlations were estimated with the Spearman method. Variables that passed the normality test were analyzed with ANOVA followed by the Bonferroni post hoc test for multiple comparisons, or with Student’s *t* test when comparing two groups. Paired data were analyzed by repeated-measures ANOVA with two factors, followed by the Bonferroni post hoc test for multiple comparisons. Correlations were estimated with the Pearson method. Categorical variables were compared using Pearson’s  $\chi^2$  test or Fisher’s exact test.

**Supplemental Information**

**Loss of floor plate Netrin-1 impairs  
midline crossing of corticospinal axons  
and leads to mirror movements**

**Oriane Pourchet, Marie-Pierre Morel, Quentin Welniarz, Nadège Sarrazin, Fabio Marti, Nicolas Heck, Cécile Galléa, Mohamed Doulazmi, Sergi Roig Puiggros, Juan Antonio Moreno-Bravo, Marie Vidailhet, Alain Trembleau, Philippe Faure, Alain Chédotal, Emmanuel Roze, and Isabelle Dusart**

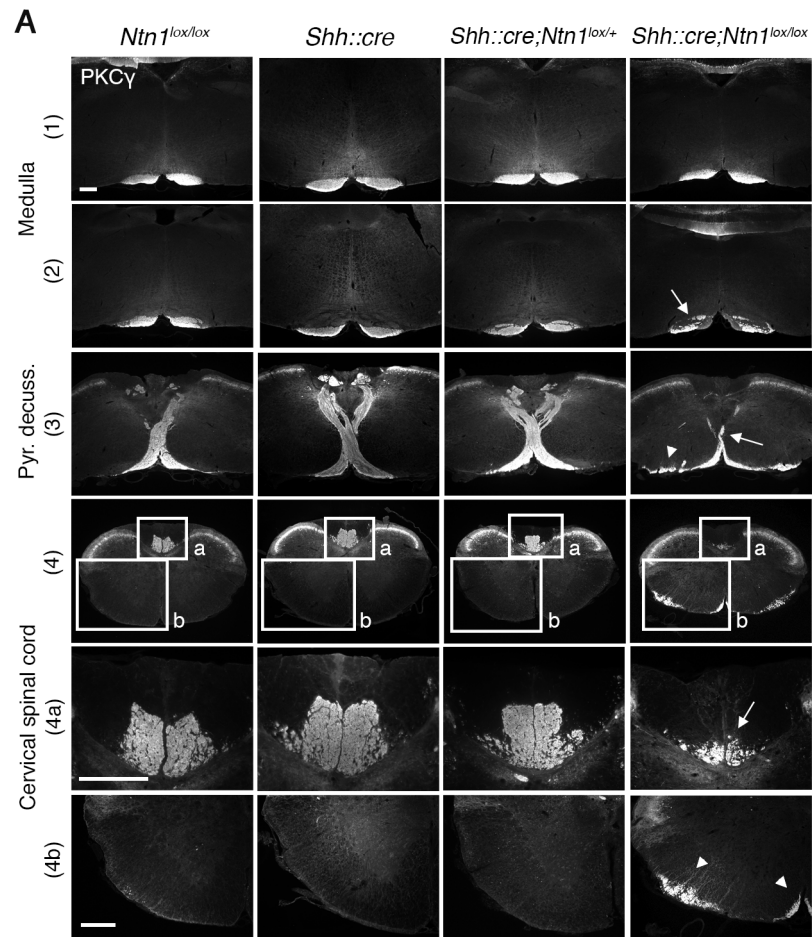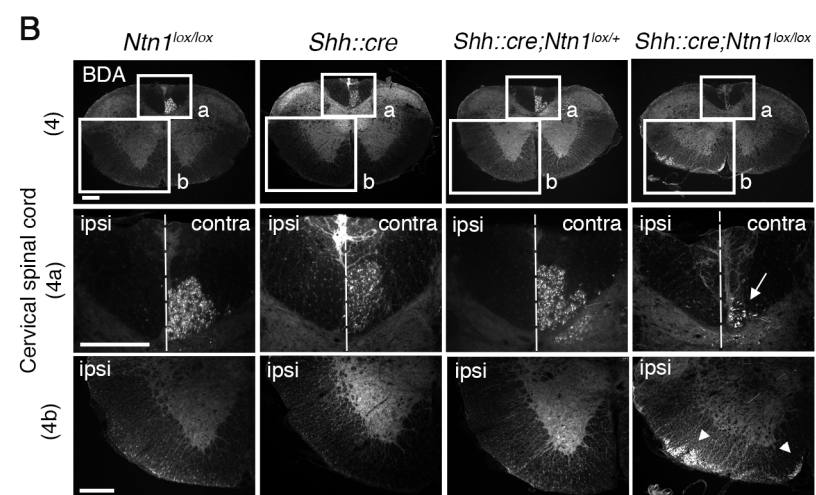

**Figure S1. Corticospinal tract guidance is disrupted at the pyramidal decussation in *Shh::cre;Ntn1<sup>lox/lox</sup>* mice. Related to Figure 1**

(A) Coronal sections of adult *Ntn1<sup>lox/lox</sup>* (n=4), *Shh::cre* (n=1), *Shh::cre;Ntn1<sup>lox/+</sup>* (n=1) and *Shh::cre;Ntn1<sup>lox/lox</sup>* mice (n=5) stained with anti-PKC $\gamma$ , a marker of the CST, at different levels: (1) upper and (2) lower medulla, (3) pyramidal decussation (pyr. decuss.), and (4) cervical spinal cord. The CST is similar in all genetic background in (1). In (2), several CST axon bundles are separated from the main tract (arrow) in *Shh::cre;Ntn1<sup>lox/lox</sup>* (arrow). This was not observed in *Ntn1<sup>lox/lox</sup>*, *Shh::cre*, or *Shh::cre;Ntn1<sup>lox/+</sup>* mice. In (3), pyramidal decussation of *Shh::cre;Ntn1<sup>lox/lox</sup>* is thinner (arrow) compared to *Ntn1<sup>lox/lox</sup>*, *Shh::cre*, or *Shh::cre;Ntn1<sup>lox/+</sup>* mice and the CST spreads laterally (arrowhead). In (4), less axons are detected in the dorsal funiculi of *Shh::cre;Ntn1<sup>lox/lox</sup>* (4a, arrow, dotted line is the midline) and some axons are seen in ectopic positions in the ventromedial and lateral funiculi (4b, arrowheads). (B) Coronal sections of the cervical spinal cord presented in (A) with revelation of biotinylated dextran amine (BDA), after unilateral injection in the left motor cortex. Fewer corticospinal axons are detected in the contralateral dorsal funiculus in *Shh::cre;Ntn1<sup>lox/lox</sup>* mice (4a, arrow) compared to *Ntn1<sup>lox/lox</sup>*, *Shh::cre*, or *Shh::cre;Ntn1<sup>lox/+</sup>* mice. In these mice, some ectopic CST axons are detected in the ipsilateral ventromedial and lateral funiculi (4b, arrowheads). Ipsi and contra are respectively ipsilateral and contralateral sides with respect to the injection side. Scale bars, 250 $\mu$ m.

**A**

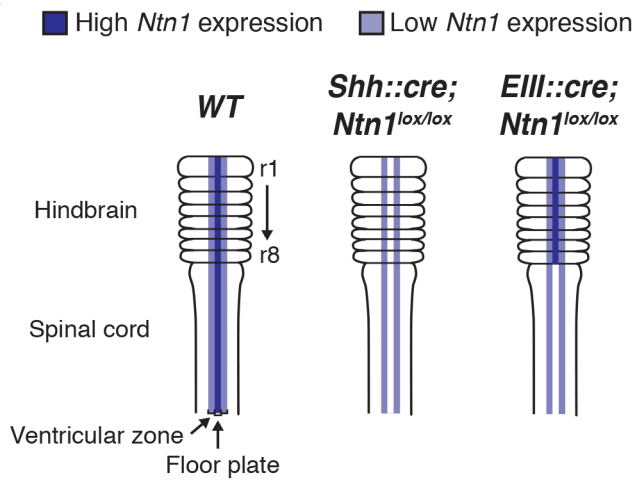

**B**

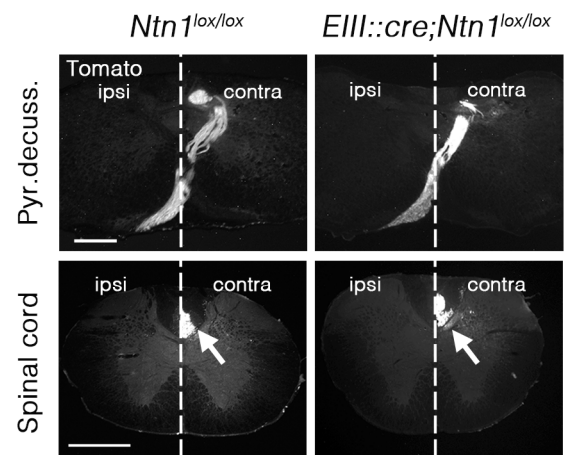

**C**

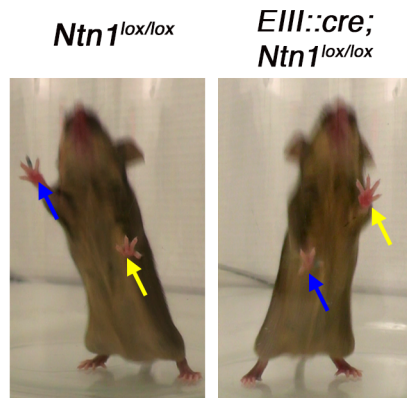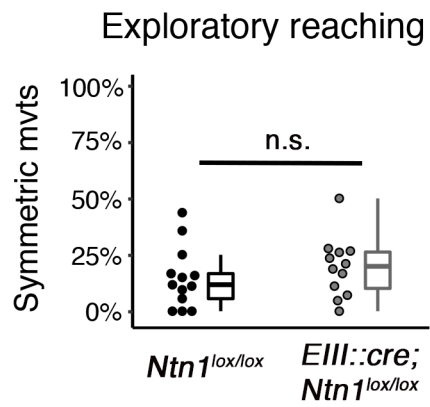

**Figure S2. Spinal cord-specific depletion of FP-*Ntn1* does not impair CST midline crossing at the pyramidal decussation nor lateralization of voluntary motor control.**

**Related to Figures 1 and 4**

(A) Schematic showing *Ntn1* expression (in purple) in the neural tube of *WT* mice (left) and after conditional ablation in *Shh::cre;Ntn1<sup>lox/lox</sup>* (middle) and *EIII::cre;Ntn1<sup>lox/lox</sup>* (right) mice. r, rhombomere. (B) Coronal sections of adult *Ntn1<sup>lox/lox</sup>* (n=3) and *EIII::cre;Ntn1<sup>lox/lox</sup>* (n=2) mice at the level of the pyramidal decussation (top) and spinal cord (bottom) after unilateral injection of a tdTomato-expressing adenovirus in the left motor cortex. At the pyramidal decussation, all the CST axons cross the midline (dotted line) in both *Ntn1<sup>lox/lox</sup>* and *EIII::cre;Ntn1<sup>lox/lox</sup>* mice. In the spinal cord, CST axons are detected in the contralateral dorsal funiculus (white arrow). Pyr. decuss., pyramidal decussation; ipsi, contra are respectively ipsilateral and contralateral sides with respect to the injection side; dotted line is the midline. Scale bars, 500µm. (C) Left: Pictures of a *Ntn1<sup>lox/lox</sup>* mouse and a *EIII::cre;Ntn1<sup>lox/lox</sup>* mouse performing alternate exploratory movements with the forepaws. Yellow and blue arrows indicate the positions of the left and right forepaws respectively. Right: The proportion of symmetric movements during exploratory reaching is comparable between *EIII::cre;Ntn1<sup>lox/lox</sup>* (n=12) and *Ntn1<sup>lox/lox</sup>* (n=13) mice.  $P=0.3738$  (two-sided t test). Data are presented as scatter and box plot, with first and third quartiles, and median.



**A**

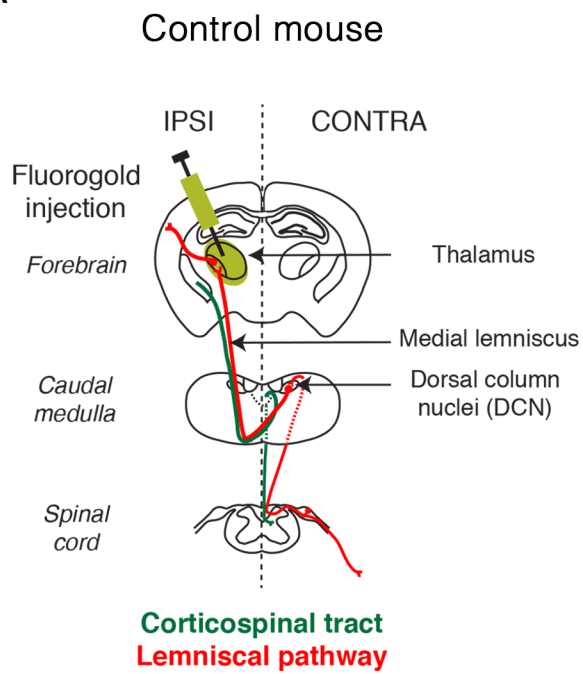

**B**

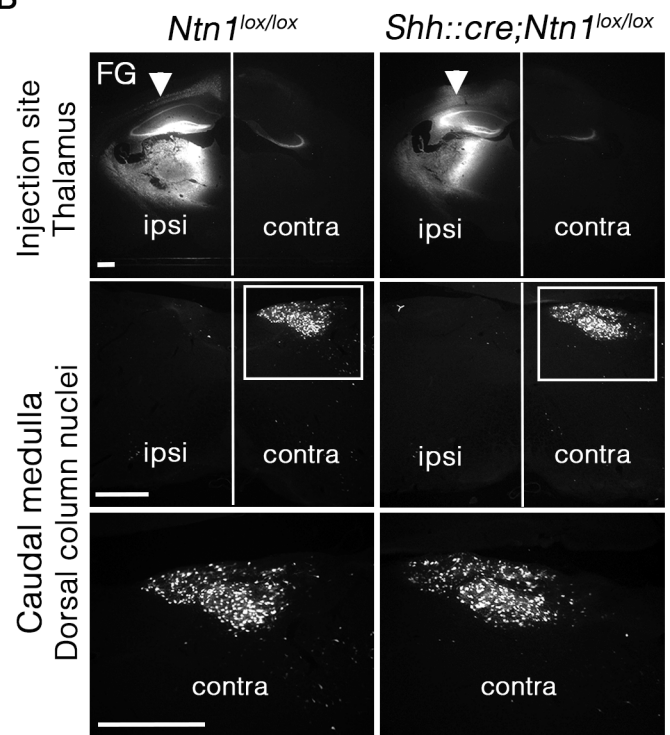

**Figure S3. Neurons of dorsal column nuclei project correctly to the contralateral thalamus in *Shh::cre;Ntn1<sup>lox/lox</sup>* mice. Related to Figure 1**

(A) Schematic showing the injection site of the retrograde tracer (yellow ellipse), the lemniscal pathway with first, second and third-order neurons (red) and the corticospinal tract (green) in an adult control mouse. (B) Top: Coronal sections of the forebrain showing the unilateral injection of FluoroGold (FG) (white arrowhead). Middle: Coronal sections of the caudal medulla where almost all FG-labeled neurons are detected in the contralateral dorsal column nuclei in both *Ntn1<sup>lox/lox</sup>* and *Shh::cre;Ntn1<sup>lox/lox</sup>* mice. Bottom: Higher magnification of the contralateral dorsal column nuclei from the section presented above (white rectangle) where FG-labeled neurons can be visualized individually. FG, Fluorogold; ipsi and contra are respectively ipsilateral and contralateral sides with respect to the injection side; dotted line is the midline. Scale bars, 500µm.

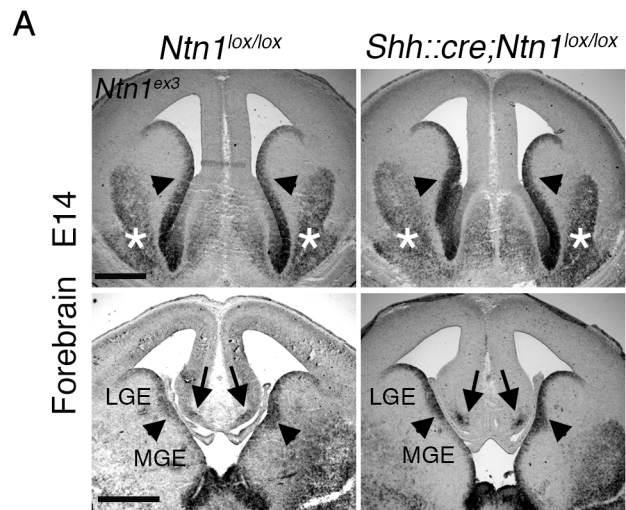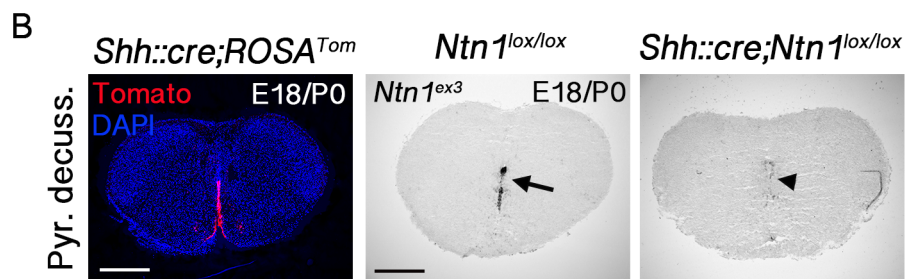

**Figure S4. During development, expression of *Ntn1* is preserved in the forebrain of *Shh::cre;Ntn1<sup>lox/lox</sup>* mice, while it is removed from the floor plate of the brainstem.**

**Related to Figure 1**

(A) Coronal sections of E14 forebrain of *Ntn1<sup>lox/lox</sup>* (n=3) and *Shh::cre;Ntn1<sup>lox/lox</sup>* mice (n=3) (top: rostral, bottom: caudal level). At E14, *Ntn1* mRNA is mostly expressed in the ventricular zone of the ganglionic eminences (arrowheads), in the ventral forebrain (white star) and in the glial wedges (arrows). This distribution is similar between *Ntn1<sup>lox/lox</sup>* and *Shh::cre;Ntn1<sup>lox/lox</sup>* mice. *Ntn1<sup>ex3</sup>*, riboprobe against the exon 3 of the mouse *Ntn1* mRNA; LGE/MGE, lateral/medial ganglionic eminence. (B) Coronal sections of E18/P0 pyramidal decussation (pyr. decuss.) of *Shh::cre;ROSA<sup>Tom</sup>* (left, n=3), *Ntn1<sup>lox/lox</sup>* (middle, n=2) and *Shh::cre;Ntn1<sup>lox/lox</sup>* (right, n=3). In *Shh::cre;ROSA<sup>Tom</sup>*, Tomato is expressed at the floor plate. At the pyramidal decussation *Ntn1* is only expressed at the floor plate (black arrow) in E18/P0 *Ntn1<sup>lox/lox</sup>* control mice. Accordingly, no remaining *Ntn1* expression (black arrowhead) can be detected at the pyramidal decussation of E18/P0 *Shh::cre;Ntn1<sup>lox/lox</sup>* control mice. Scale bars, 500µm.

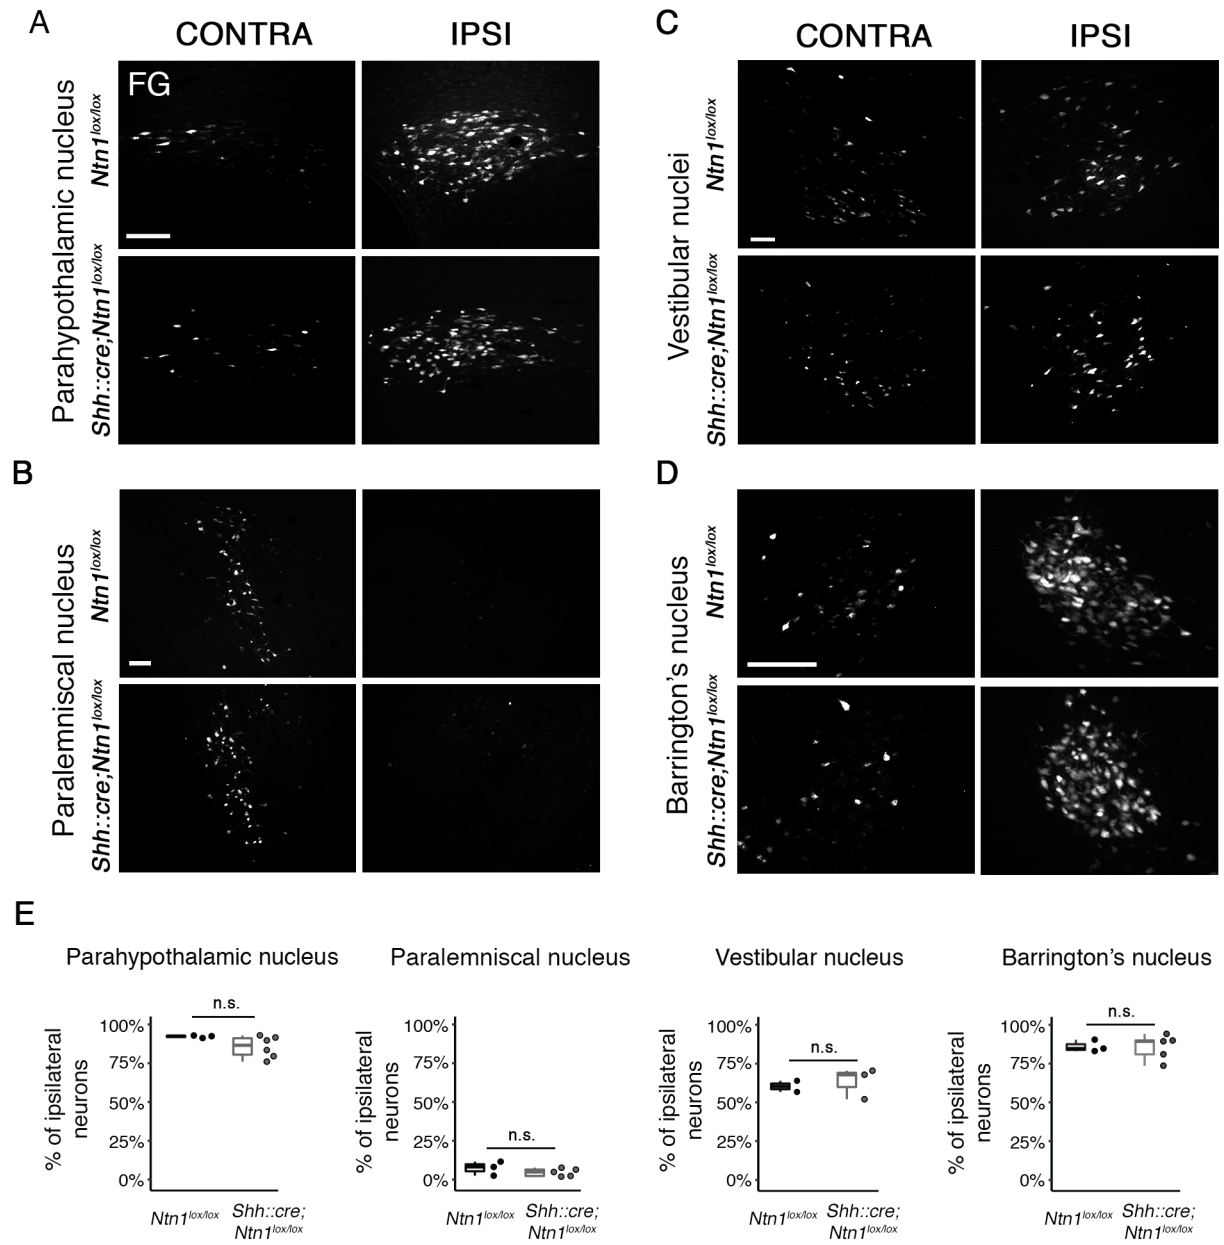

**Figure S5 Lateralization of the spinal projections of parhypothalamic nucleus, paralemniscal nucleus, vestibular nuclei and Barrington's nucleus is preserved in *Shh::cre;NtnI<sup>lox/lox</sup>* mice. Related to Figure 2**

(A) Coronal sections of the contralateral and ipsilateral parhypothalamic nuclei of *NtnI<sup>lox/lox</sup>* (n=3) and *Shh::cre;NtnI<sup>lox/lox</sup>* mice (n=6). FluoroGold (FG)-positive neurons are mostly detected on the ipsilateral side in both *NtnI<sup>lox/lox</sup>* and *Shh::cre;NtnI<sup>lox/lox</sup>* mice. (B) Coronal sections of the contralateral and ipsilateral paralemniscal nuclei of *NtnI<sup>lox/lox</sup>* (n=3) and *Shh::cre;NtnI<sup>lox/lox</sup>* mice (n=5). Almost all FG-positive neurons are detected on the contralateral side in both *NtnI<sup>lox/lox</sup>* and *Shh::cre;NtnI<sup>lox/lox</sup>* mice. (C) Coronal sections of the contralateral and ipsilateral vestibular nuclei of *NtnI<sup>lox/lox</sup>* (n=2) and *Shh::cre;NtnI<sup>lox/lox</sup>* mice (n=3). FG-positive neurons are detected on both sides, with a slightly higher proportion of labeled neurons on the ipsilateral side for both *NtnI<sup>lox/lox</sup>* and *Shh::cre;NtnI<sup>lox/lox</sup>* mice. (D) Coronal sections of the contralateral and ipsilateral Barrington's nuclei of *NtnI<sup>lox/lox</sup>* (n=3) and *Shh::cre;NtnI<sup>lox/lox</sup>* mice (n=5). FG-positive neurons are mostly detected on the ipsilateral side for both *NtnI<sup>lox/lox</sup>* and *Shh::cre;NtnI<sup>lox/lox</sup>* mice. Ipsi and contra are respectively ipsilateral and contralateral sides with respect to the injection side. Scale bars, 100 $\mu$ m. (E) Quantification of the lateralization of FG labeling in *NtnI<sup>lox/lox</sup>* (black dots) and *Shh::cre;NtnI<sup>lox/lox</sup>* mice (grey dots).  $P_{Parahypothalamic}=0.054$  (two-sided t test);  $P_{Paralateral}=0.302$  (two-sided t test);  $P_{Vestibular}=0.723$  (two-sided t test);  $P_{Barrington}=0.943$  (two-sided t test). Data are presented as scatter and box plot, with first and third quartiles, and median.
